# Supplementary material for: Tetralactam macrocycle based indicator displacement assay for colorimetric and fluorometric dual-mode detection of urinary uric acid
Source: Royal Society of Chemistry journal article supplement (doi:10.1039/d2cc06622j), 2023-01-01
Supplement: d2cc06622j1.pdf [file d2cc06622j1.pdf]

## Electronic Supplementary Information

# **Tetralactam macrocycle based indicator displacement assay for colorimetric and fluorometric dual-mode detection of urinary uric acid**

Huan Yao,<sup>†a</sup> Shi-Yao Li,<sup>†a</sup> Hong Zhang,<sup>b</sup> Xin-Yu Pang,<sup>b</sup> Jia-Le Lu,<sup>a</sup> Cong Chen,<sup>c</sup> Wei Jiang,<sup>‡b</sup>  
Liu-Pan Yang,<sup>\*a</sup> and Li-Li Wang<sup>\*a</sup>

<sup>a</sup> School of Pharmaceutical Science, Postdoctoral Research Station of Basic Medicine, Hengyang Medical School, University of South China, Hengyang, Hunan, 421001, China. E-mail: yanglp@usc.edu.cn, wangll@usc.edu.cn.

<sup>b</sup> Department of Chemistry, Southern University of Science and Technology, Xueyuan Blvd 1088, Shenzhen, 518055, China.

<sup>c</sup> Department of Clinical Laboratory Medicine, Institution of Microbiology and Infectious Diseases, The First Affiliated Hospital, Hengyang Medical School, University of South China, Hengyang, Hunan, 421001, China.

<sup>†</sup> These authors contributed equally to this work.

<sup>‡</sup> deceased (2022.12)

## CONTENT

|                                                            |             |
|------------------------------------------------------------|-------------|
| <b>1. Experimental Section .....</b>                       | <b>S-1</b>  |
| <b>2. NMR Spectra of Host-Guest Complexes .....</b>        | <b>S-3</b>  |
| <b>3. Determination of Binding Parameters .....</b>        | <b>S-7</b>  |
| <b>4. Computational Host-Guest Complex Structures.....</b> | <b>S-8</b>  |
| <b>5. The Detection of Uric Acid .....</b>                 | <b>S-16</b> |
| <b>6. Testing of Real Urine Samples .....</b>              | <b>S-25</b> |
| <b>7. Computational Data .....</b>                         | <b>S-28</b> |
| <b>8. References .....</b>                                 | <b>S-38</b> |

# 1. Experimental Section

## 1.1 General Method

All the guest molecules involved in this research were commercially available and used without further purification unless otherwise noted. Solvents were either employed as purchased or dried prior to use by standard laboratory procedures. Ultrapure water was purified from Chuangchun pure water machine CCH-H200.  $^1\text{H}$ ,  $^{13}\text{C}$  NMR spectra were recorded on a Bruker Avance 500 NMR spectrometer. All chemical shifts are reported in ppm with residual solvents or TMS (tetramethylsilane) as the internal standards. Fluorescence spectra (FL) were obtained on a Hitachi F-7100 fluorescence spectrophotometer. UV-vis spectra (UV) were obtained on a Shimadzu UV-2600i spectrometer. Scanning electron microscope (SEM) was tested by Phenom XL. HPLC data were obtained by Waters E2695. The synthesis of water soluble tetralactam macrocycle **H1** has been reported earlier.<sup>[1]</sup>

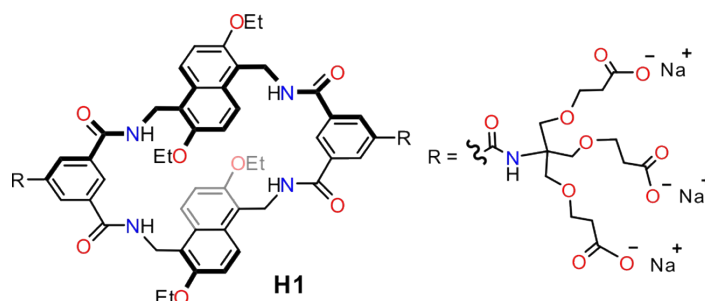

## 1.2 UV-vis Titrations

For UV-vis titrations, a  $1.0 \times 10^{-5}$ – $2.5 \times 10^{-5}$  M solution of the guest was prepared in PB buffer (10 mM, pH = 7.4, 25 °C) and a  $0.8 \times 10^{-3}$ – $5 \times 10^{-3}$  M solution of the host was prepared by using the prepared guest solution. The guest solution was placed in a cuvette (2 mL) at 25 °C. The solution of the host was then titrated until the UV absorbance did not change. The maximum change in absorbance was calculated from the theoretical fit at complete 1:1 binding isotherm was assumed for all titrations. Nonlinear curve-fitting method was then used to obtain the association constant through the following equation:

$$A = A_0 + \left( \frac{(A - A_0)/2}{G_0} \right) * (G_0 + H + 1/K_a - \sqrt{(G_0 + H + 1/K_a)^2 - 4 * G_0 * H})$$

All of these UV-vis titration experiments have been repeated three times. Errors are smaller than  $\pm 10\%$ .

## 1.3 Fluorescence Titrations

For fluorescence titrations, a  $2.0 \times 10^{-6}$ – $2.5 \times 10^{-5}$  M solution of the guest was prepared in PB buffer (10 mM, pH = 7.4, 25 °C) and a  $1.0 \times 10^{-3}$ – $2.5 \times 10^{-3}$  M solution of the host was prepared by using the prepared guest solution. The guest solution was placed in a cuvette (2 mL) at 25 °C. The solution of the host was then titrated until the fluorescence intensity did not change. The maximum change in fluorescence was calculated from the theoretical fit at complete 1:1 binding isotherm was assumed for all titrations. Nonlinear curve-fitting method was then used to obtain the association constant through the following equation:

$$I=I_0+\frac{(I-I_0)}{2G_0}(G_0+H+\frac{1}{K_a}-\sqrt{(G_0+H+\frac{1}{K_a})^2-4G_0H})$$

All of these fluorescence titration experiments have been repeated three times. Errors are smaller than  $\pm 10\%$ .

To get the binding constants of **UA**, we also used the competitive titration method.<sup>[2]</sup> The calibration lines were established at 25 °C in the intensity of the fluorescence responses of **RF@HI** reporter pair upon gradual titration of **UA** in PB buffer solution (10 mM, pH = 7.4). The fitting module for competitive titration was downloaded from the website of Prof. Nau's group. Accordingly, the increase in fluorescence intensity (I) by displacement of **RF** with varying competitor concentration follows:

$$I/I_0=I_{\max}+([H_0](I_{\text{rel}}-I_{\max}))/K_{\text{RF}}+[H_0]$$

Where  $I_0$  is the fluorescence intensity in the absence of competition,  $I_{\max}$  is the fluorescence intensity of **RF** at quantitative displacement, and  $I_{\text{rel}}$  is the relative fluorescence intensity of complexed **RF**.  $K_{\text{RF}}$  is the known binding constant of the complex and  $[H_0]$  is the concentration of uncomplexed **HI**. All experiments were carried out in PB buffer solution (10 mM, pH = 7.4) at 25 °C. All of these fluorescence titration experiments have been repeated three times. Errors are smaller than  $\pm 10\%$ .

## 1.4 High Performance Liquid Chromatography (HPLC)

### 1.4.1 Preparation of standard solution

The uric acid was dissolved in PB buffer (10 mM, pH = 7.4), prepared into 0.5 mM and stored at 4 °C. Appropriate amount of 0.5 mM uric acid standard solution was obtained by a micropipette. Then, it was diluted with PB buffer (10 mM, pH = 7.4), to prepare a series of standard solutions of 10, 25, 50, 100, 150, 200, 300, 400, 500  $\mu\text{M}$  successively.

### 1.4.2 Pretreatment of real urine samples

200  $\mu\text{L}$  urine sample was taken into a 5 mL centrifuge tube, added with 1800  $\mu\text{L}$  PB buffer (10 mM, pH = 7.4), ultrasonic for 10 min, centrifuge at 4000 r/min for 8 min, the supernatant was taken through 0.22  $\mu\text{m}$  microporous filter membrane for later use.

### 1.4.3 Detection by HPLC

All urine samples were preliminarily determined by HPLC. In this study, methanol: 3% phosphoric acid aqueous solution = 70:30 was used as the mobile phase. Symmetry C18 Column was used to analyze the urine samples, and the uric acid separation effect was good. The injection volume and time were 20  $\mu\text{L}$  and 10 min respectively, and the flow rate was 0.7 mL/min.

## 2. NMR Spectra of Host-Guest Complexes

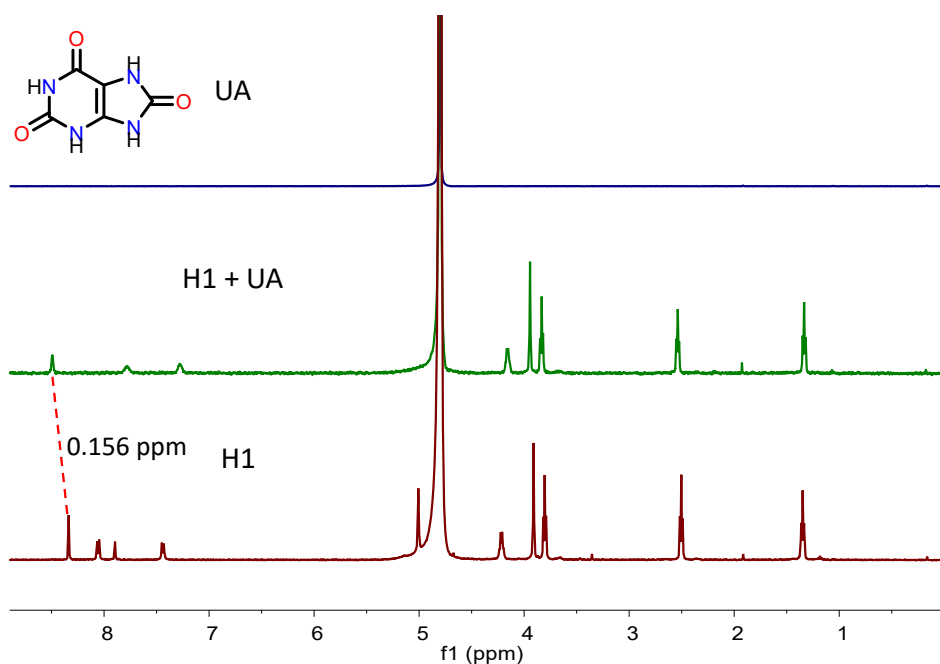

Fig. S1. <sup>1</sup>H NMR spectra (500 MHz, D<sub>2</sub>O, 298 K) of uric acid (**UA**), **H1** (0.25 mM), and its equimolar mixture. The proton of the guest experiences the upfield shift, suggesting that the complexation between **H1** and guest **UA**.

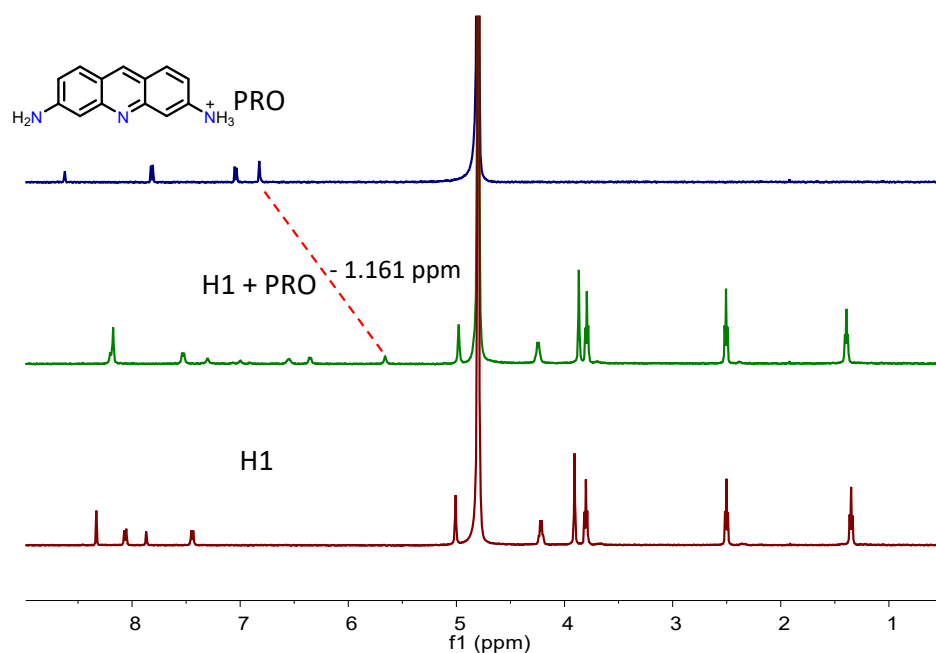

Fig. S2. <sup>1</sup>H NMR spectra (500 MHz, D<sub>2</sub>O, 298 K) of **Proflavine**, **H1** (0.25 mM), and its equimolar mixture. The proton of the guest experiences the upfield shift, suggesting that the complexation between **H1** and guest **Proflavine**.

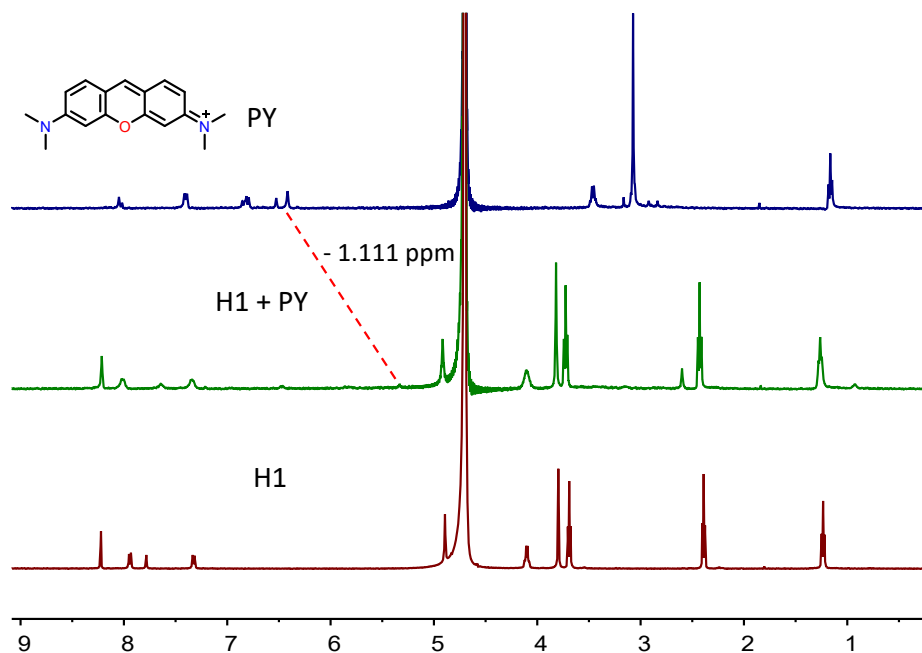

Fig. S3. <sup>1</sup>H NMR spectra (500 MHz, D<sub>2</sub>O, 298 K) of **Pyronin Y**, **H1** (0.25 mM), and its equimolar mixture. The proton of the guest experiences the upfield shift, suggesting that the complexation between **H1** and guest **Pyronin Y**.

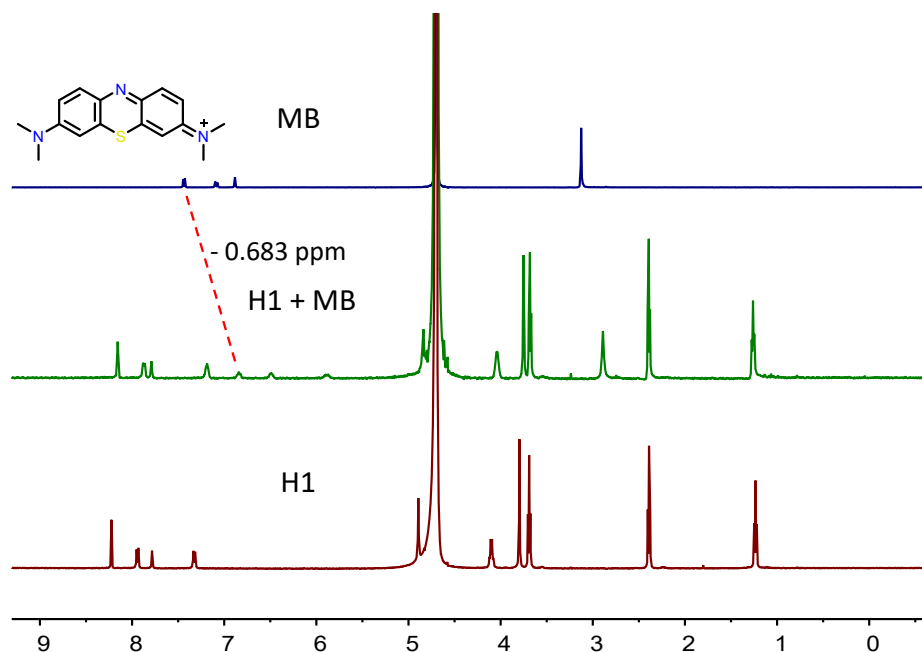

Fig. S4. <sup>1</sup>H NMR spectra (500 MHz, D<sub>2</sub>O, 298 K) of **Methylene Blue**, **H1** (0.25 mM), and its equimolar mixture. The proton of the guest experiences the upfield shift, suggesting that the complexation between **H1** and guest **Methylene Blue**.

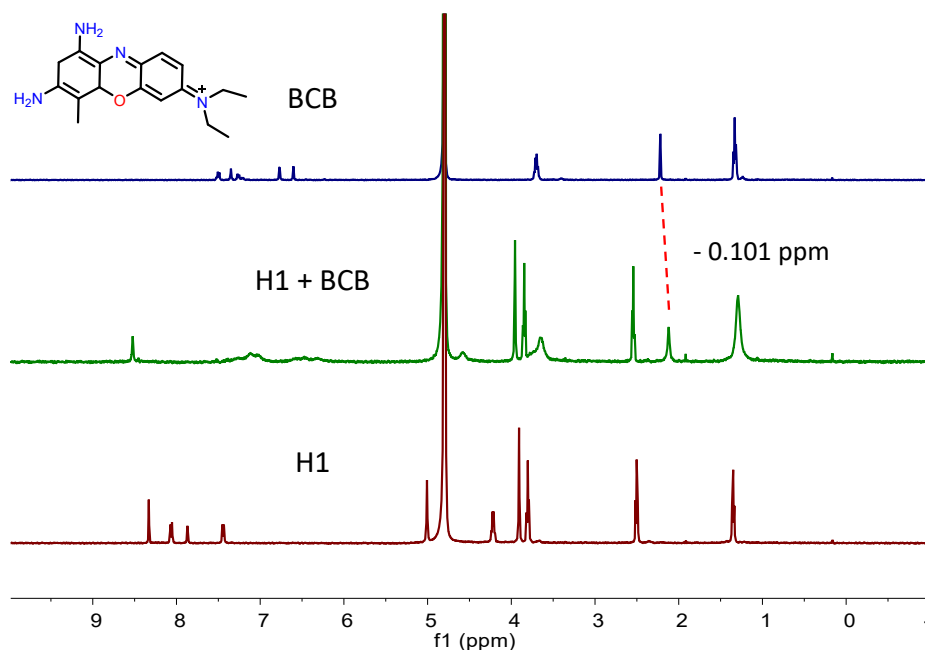

Fig. S5.  $^1\text{H}$  NMR spectra (500 MHz,  $\text{D}_2\text{O}$ , 298 K) of **Brilliant Cresyl Blue**, **H1** (0.25 mM), and its equimolar mixture. The proton of the guest experiences the upfield shift, suggesting that the complexation between **H1** and guest **Brilliant Cresyl Blue**.

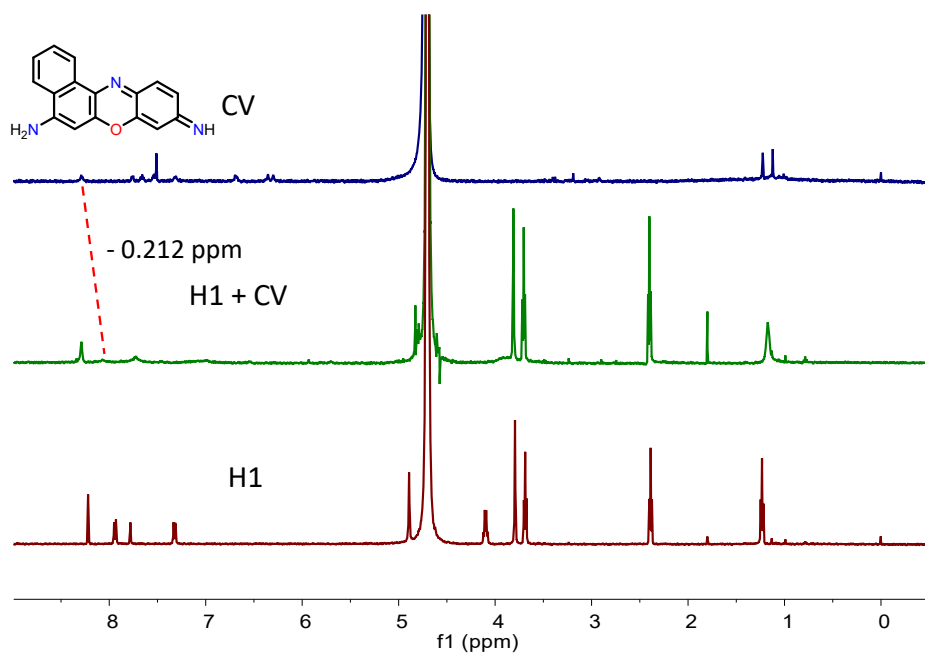

Fig. S6.  $^1\text{H}$  NMR spectra (500 MHz,  $\text{D}_2\text{O}$ , 298 K) of **Cresyl Violet**, **H1** (0.25 mM), and its equimolar mixture. The proton of the guest experiences the upfield shift, suggesting that the complexation between **H1** and guest **Cresyl Violet**.

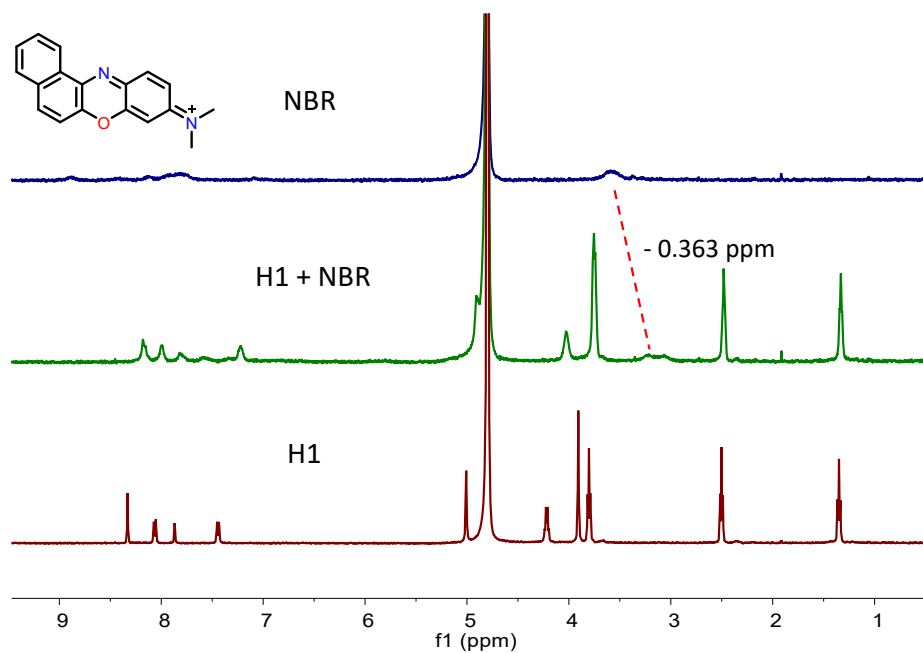

Fig. S7.  $^1\text{H}$  NMR spectra (500 MHz,  $\text{D}_2\text{O}$ , 298 K) of **Medola's Blue**, **H1** (0.25 mM), and its equimolar mixture. The proton of the guest experiences the upfield shift, suggesting that the complexation between **H1** and guest **Medola's Blue**.

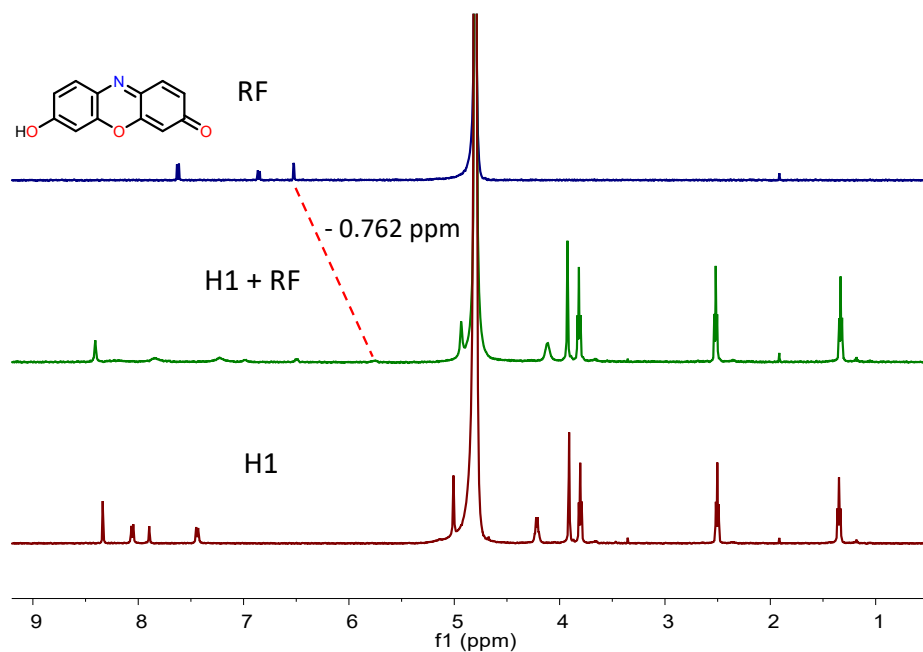

Fig. S8.  $^1\text{H}$  NMR spectra (500 MHz,  $\text{D}_2\text{O}$ , 298 K) of **Resorufin**, **H1** (0.25 mM), and its equimolar mixture. The proton of the guest experiences the upfield shift, suggesting that the complexation between **H1** and guest **Resorufin**.

### 3. Determination of Binding Parameters

All of these UV-vis and fluorescence titration experiments have been repeated three times, and the average values and standard deviations are given in Table S1. Errors are smaller than  $\pm 10\%$ . The following is the figure of one of three repeated experiments.

**Table S1. Binding constants ( $K_a$ ) of dyes with H1 as determined by UV-vis, fluorescence (FL), and ITC titrations (PB buffer, 10 mM, pH 7.4) at 25 °C.**

| Dye                    | $K_a$ ( $M^{-1}$ )            |                               |                   |
|------------------------|-------------------------------|-------------------------------|-------------------|
|                        | UV-vis                        | FL                            | ITC               |
| <b>PRO</b>             | $(1.85 \pm 0.12) \times 10^4$ | $(2.76 \pm 0.25) \times 10^4$ | -                 |
| <b>PY</b>              | $(1.91 \pm 0.04) \times 10^5$ | $(2.15 \pm 0.19) \times 10^5$ | -                 |
| <b>RFN<sup>a</sup></b> | -                             | -                             | $1.2 \times 10^7$ |
| <b>MB</b>              | $(3.98 \pm 0.19) \times 10^5$ | $(4.45 \pm 0.33) \times 10^5$ | -                 |
| <b>RF</b>              | $(4.63 \pm 0.15) \times 10^4$ | $(3.83 \pm 0.20) \times 10^4$ | -                 |
| <b>BCB</b>             | $(4.62 \pm 0.17) \times 10^4$ | $(6.43 \pm 0.58) \times 10^4$ | -                 |
| <b>CV</b>              | <sup>-b</sup>                 | $(8.49 \pm 0.23) \times 10^5$ | -                 |
| <b>NBR</b>             | $(4.97 \pm 0.27) \times 10^4$ | $(8.70 \pm 0.08) \times 10^4$ | -                 |

<sup>a</sup> Value was taken from ref 1; <sup>b</sup> The binding constant was too large to fit accurately.

#### 3.1 UV-vis Titrations

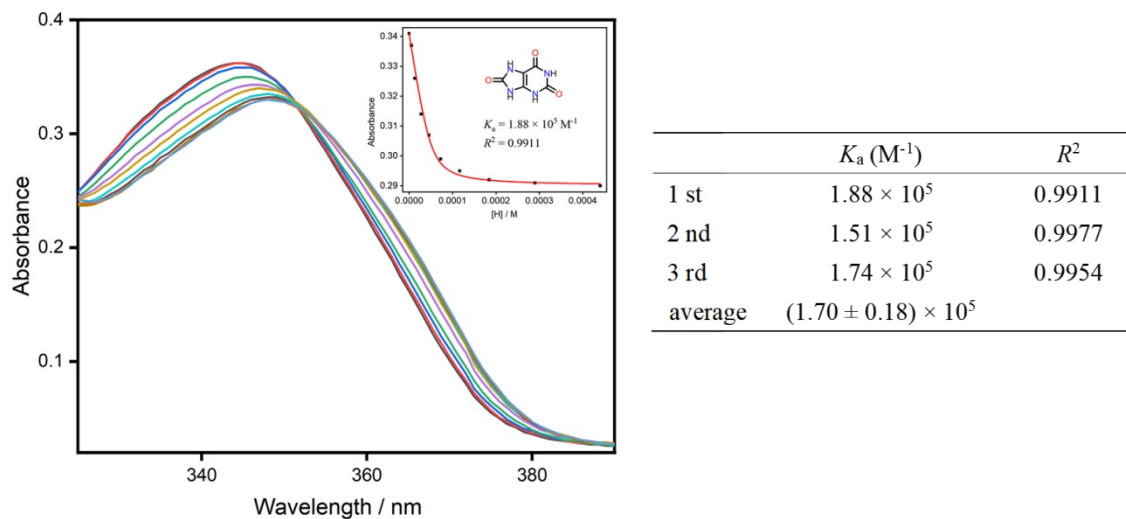

Fig. S9. UV-vis titration of compound **H1** with UA in PB buffer (10 mM, pH = 7.4, [G] = 3.7 mM; [H1] = 50  $\mu$ M). Fit of the titration data at  $\lambda_{ab} = 344$  nm to a single-site binding isotherm



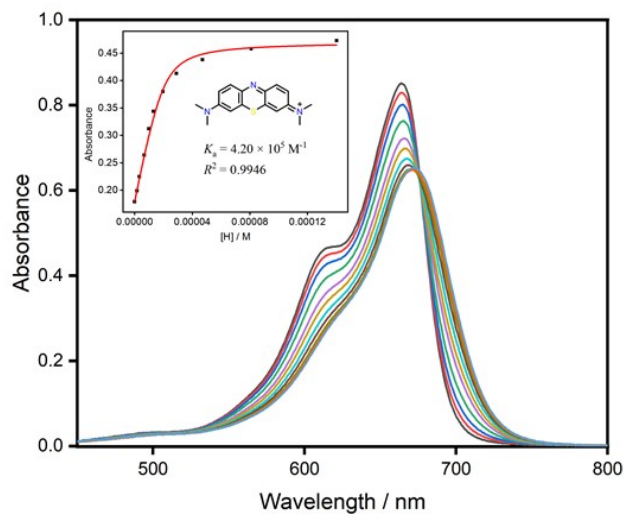

|         | $K_a$ ( $M^{-1}$ )            | $R^2$  |
|---------|-------------------------------|--------|
| 1 st    | $4.20 \times 10^5$            | 0.9946 |
| 2 nd    | $3.85 \times 10^5$            | 0.9965 |
| 3 rd    | $3.89 \times 10^5$            | 0.9973 |
| average | $(3.98 \pm 0.19) \times 10^5$ |        |

Fig. S10. UV-vis titration of compound **Methylene Blue** with **H1** in PB buffer (10 mM, pH = 7.4,  $[G] = 20 \mu M$ ;  $[H1] = 0.8$  mM). Fit of the titration data at  $\lambda_{ab} = 691$  nm to a single-site binding isotherm.

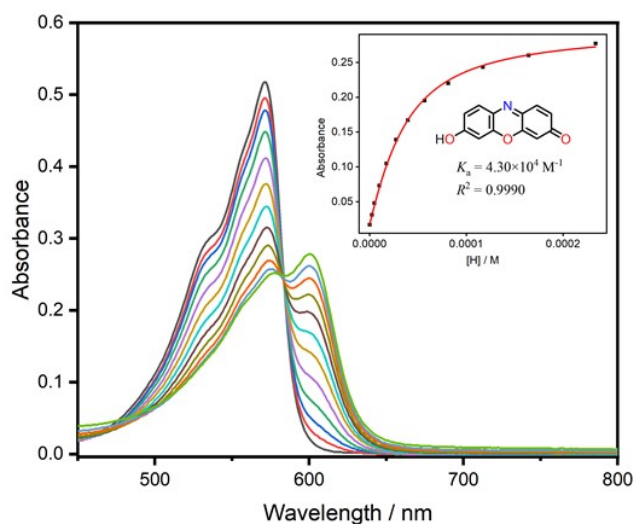

|         | $K_a$ ( $M^{-1}$ )            | $R^2$  |
|---------|-------------------------------|--------|
| 1 st    | $4.30 \times 10^4$            | 0.9990 |
| 2 nd    | $3.94 \times 10^4$            | 0.9980 |
| 3 rd    | $4.01 \times 10^4$            | 0.9980 |
| average | $(4.08 \pm 0.19) \times 10^4$ |        |

Fig. S11. UV-vis titration of compound **Resorufin** with **H1** in PB buffer (10 mM, pH = 7.4,  $[G] = 25 \mu M$ ;  $[H1] = 5$  mM). Fit of the titration data at  $\lambda_{ab} = 602$  nm to a single-site binding isotherm.

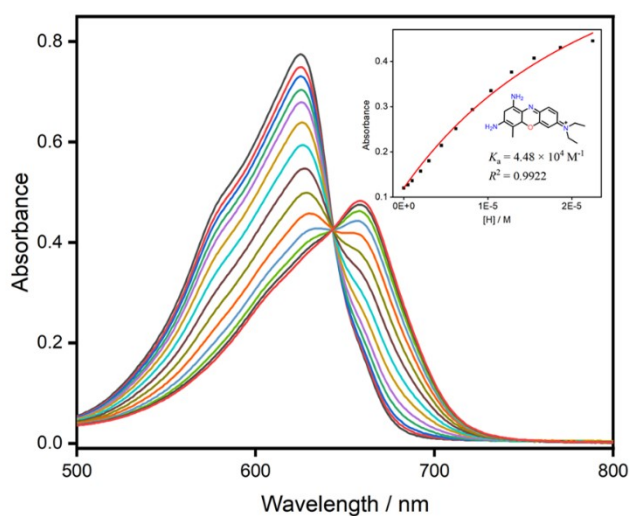

|         | $K_a$ ( $M^{-1}$ )            | $R^2$  |
|---------|-------------------------------|--------|
| 1 st    | $4.48 \times 10^4$            | 0.9922 |
| 2 nd    | $4.80 \times 10^4$            | 0.9991 |
| 3 rd    | $4.56 \times 10^4$            | 0.9917 |
| average | $(4.08 \pm 0.19) \times 10^4$ |        |

Fig. S12. UV-vis titration of compound **Brilliant Cresyl Blue** with **H1** in PB buffer (10 mM, pH = 7.4,  $[G] = 5 \mu M$ ;  $[H1] = 1 \text{ mM}$ ). Fit of the titration data at  $\lambda_{ab} = 666 \text{ nm}$  to a single-site binding isotherm.

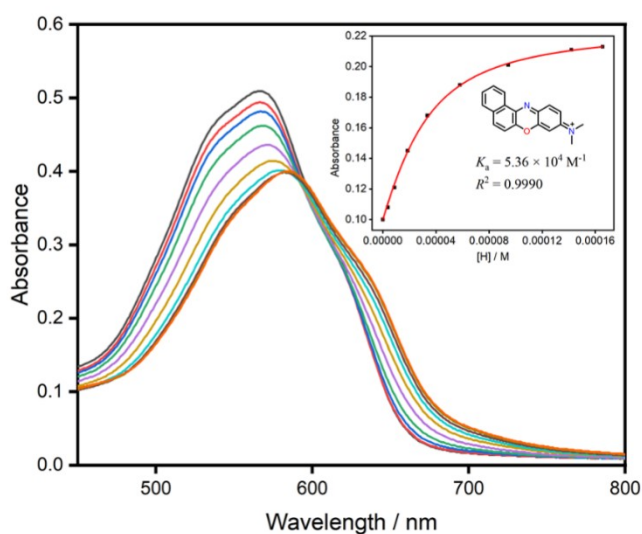

|         | $K_a$ ( $M^{-1}$ )            | $R^2$  |
|---------|-------------------------------|--------|
| 1 st    | $5.36 \times 10^4$            | 0.9990 |
| 2 nd    | $4.76 \times 10^4$            | 0.9995 |
| 3 rd    | $4.81 \times 10^4$            | 0.9993 |
| average | $(4.97 \pm 0.27) \times 10^4$ |        |

Fig. S13. UV-vis titration of compound **Meldola's Blue** with **H1** in PB buffer (10 mM, pH = 7.4,  $[G] = 5 \mu M$ ;  $[H1] = 1 \text{ mM}$ ). Fit of the titration data at  $\lambda_{ab} = 666 \text{ nm}$  to a single-site binding isotherm.

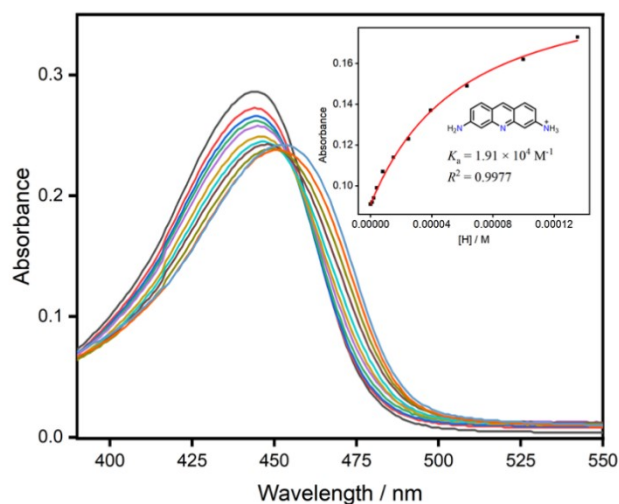

|         | $K_a$ ( $M^{-1}$ )            | $R^2$  |
|---------|-------------------------------|--------|
| 1 st    | $1.91 \times 10^4$            | 0.9977 |
| 2 nd    | $1.92 \times 10^4$            | 0.9988 |
| 3 rd    | $1.71 \times 10^4$            | 0.9958 |
| average | $(1.85 \pm 0.12) \times 10^4$ |        |

Fig. S14. UV-vis titration of compound **Proflavin** with **H1** in PB buffer (10 mM, pH = 7.4, [G] = 10  $\mu$ M; [**H1**] = 5 mM). Fit of the titration data at  $\lambda_{ab} = 470$  nm to a single-site binding isotherm.

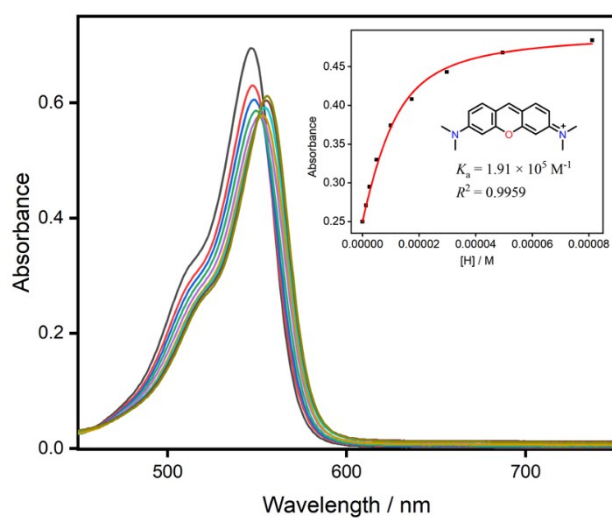

|         | $K_a$ ( $M^{-1}$ )            | $R^2$  |
|---------|-------------------------------|--------|
| 1 st    | $1.91 \times 10^5$            | 0.9959 |
| 2 nd    | $1.87 \times 10^5$            | 0.9908 |
| 3 rd    | $1.94 \times 10^5$            | 0.9931 |
| average | $(1.91 \pm 0.04) \times 10^5$ |        |

Fig. S15. UV-vis titration of compound **Pyronin Y** with **H1** in PB buffer (10 mM, pH = 7.4, [G] = 10  $\mu$ M; [**H1**] = 5 mM). Fit of the titration data at  $\lambda_{ab} = 564$  nm to a single-site binding isotherm.

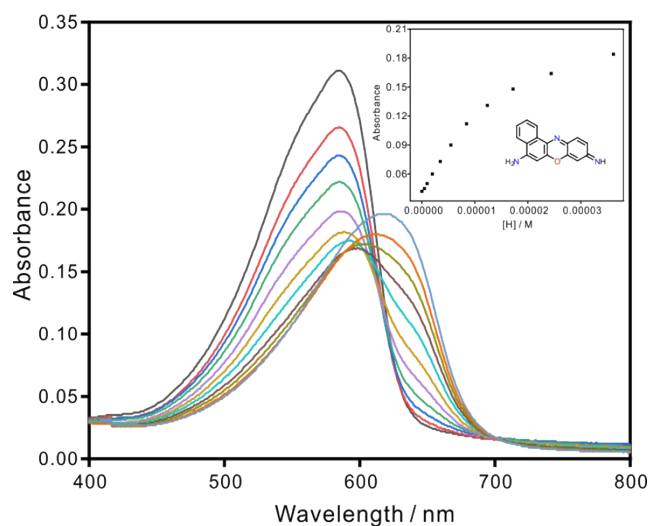

Fig. S16. UV-vis titration of compound **Cresyl Violet** with **H1** in PB buffer (10 mM, pH = 7.4, [G] = 10  $\mu$ M; [**H1**] = 5 mM). The binding constant was too large to fit accurately.

### 3.2 Fluorescence Titrations

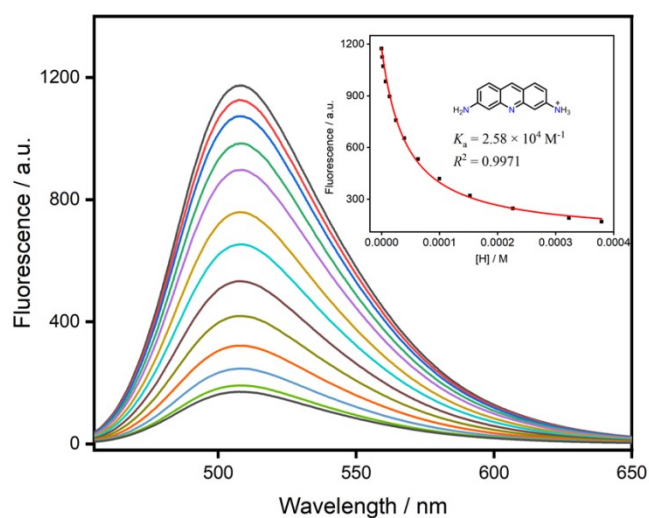

|         | $K_a$ ( $M^{-1}$ )            | $R^2$  |
|---------|-------------------------------|--------|
| 1 st    | $2.58 \times 10^4$            | 0.9971 |
| 2 nd    | $2.65 \times 10^4$            | 0.9977 |
| 3 rd    | $3.05 \times 10^4$            | 0.9987 |
| average | $(2.76 \pm 0.25) \times 10^4$ |        |

Fig. S17. Fluorescence titration of compound **Proflavine** with **H1** in PB buffer (10 mM, pH = 7.4, [G] = 5  $\mu$ M; [**H1**] = 2 mM). Fit of the titration data at  $\lambda_{em} = 509$  nm to a single-site binding isotherm.

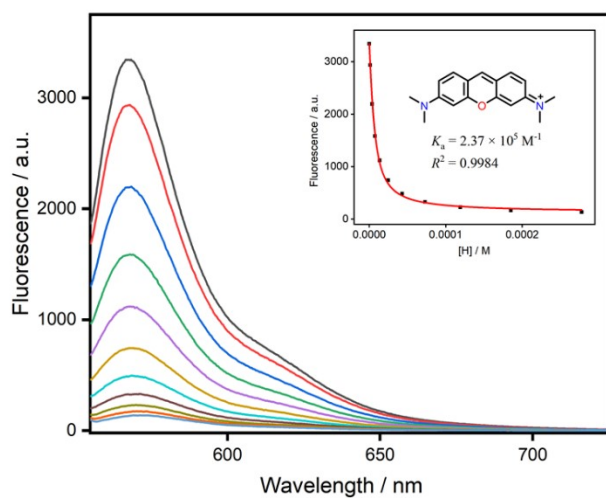

|         | $K_a$ ( $M^{-1}$ )            | $R^2$  |
|---------|-------------------------------|--------|
| 1 st    | $2.37 \times 10^5$            | 0.9984 |
| 2 nd    | $2.02 \times 10^5$            | 0.9967 |
| 3 rd    | $2.07 \times 10^5$            | 0.9971 |
| average | $(2.15 \pm 0.19) \times 10^4$ |        |

Fig. S18. Fluorescence titration of compound **Pyronin Y** with **H1** in PB buffer (10 mM, pH = 7.4, [G] = 5  $\mu$ M; [H1] = 2.5 mM). Fit of the titration data at  $\lambda_{em} = 568$  nm to a single-site binding isotherm.

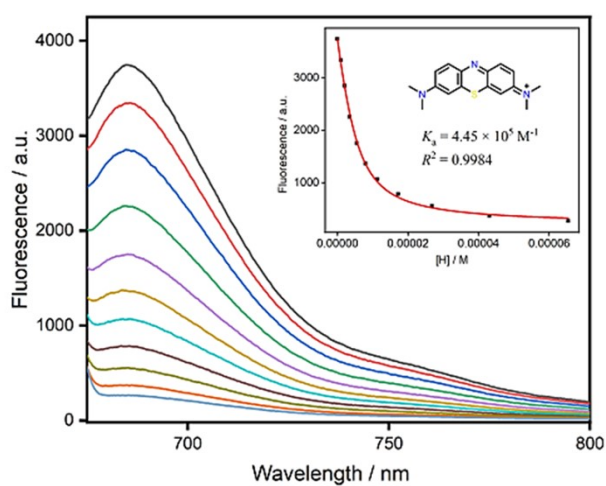

|         | $K_a$ ( $M^{-1}$ )            | $R^2$  |
|---------|-------------------------------|--------|
| 1 st    | $4.45 \times 10^5$            | 0.9984 |
| 2 nd    | $4.05 \times 10^5$            | 0.9974 |
| 3 rd    | $4.85 \times 10^5$            | 0.9976 |
| average | $(4.45 \pm 0.33) \times 10^5$ |        |

Fig. S19. Fluorescence titration of compound **Methylene Blue** with **H1** in PB buffer (10 mM, pH = 7.4, [G] = 5  $\mu$ M; [H1] = 1 mM). Fit of the titration data at  $\lambda_{em} = 685$  nm to a single-site binding isotherm.

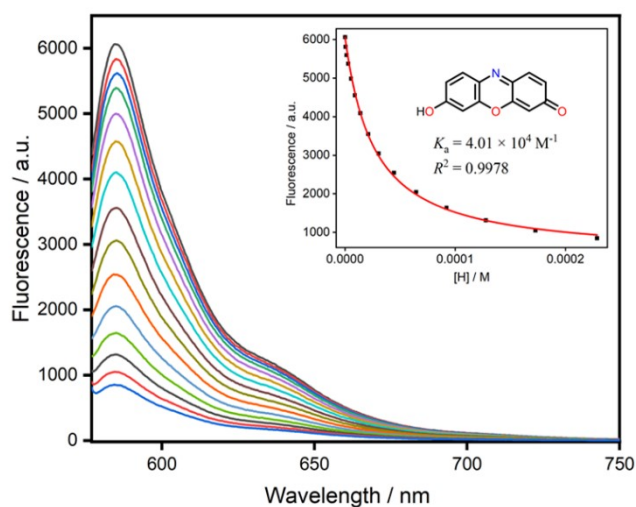

|         | $K_a$ ( $M^{-1}$ )            | $R^2$  |
|---------|-------------------------------|--------|
| 1 st    | $4.01 \times 10^4$            | 0.9978 |
| 2 nd    | $3.61 \times 10^4$            | 0.9995 |
| 3 rd    | $3.86 \times 10^4$            | 0.9976 |
| average | $(3.82 \pm 0.20) \times 10^4$ |        |

Fig. S20. Fluorescence titration of compound **Resorufin** with **H1** in PB buffer (10 mM, pH = 7.4, [G] = 2  $\mu$ M; [H1] = 2.5 mM). Fit of the titration data at  $\lambda_{em} = 586$  nm to a single-site binding isotherm.

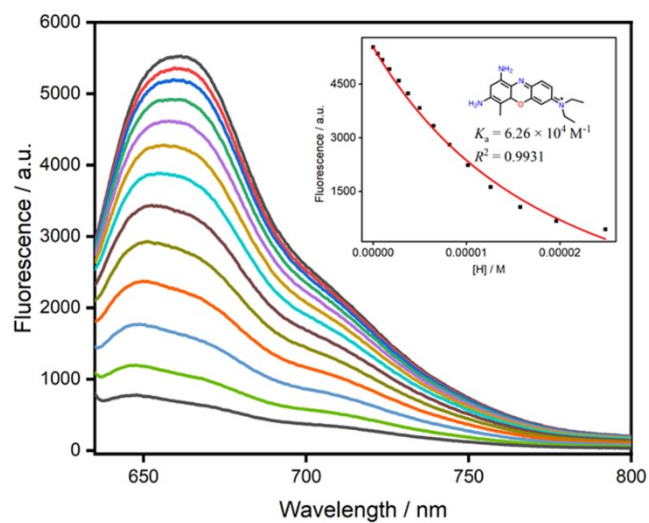

|         | $K_a$ ( $M^{-1}$ )            | $R^2$  |
|---------|-------------------------------|--------|
| 1 st    | $6.26 \times 10^4$            | 0.9931 |
| 2 nd    | $7.07 \times 10^4$            | 0.9924 |
| 3 rd    | $5.94 \times 10^4$            | 0.9900 |
| average | $(6.43 \pm 0.58) \times 10^4$ |        |

Fig. S21. Fluorescence titration of compound **Brilliant Cresyl Blue** with **H1** in PB buffer (10 mM, pH = 7.4, [G] = 5  $\mu$ M; [H1] = 1 mM). Fit of the titration data at  $\lambda_{em} = 663$  nm to a single-site binding isotherm.

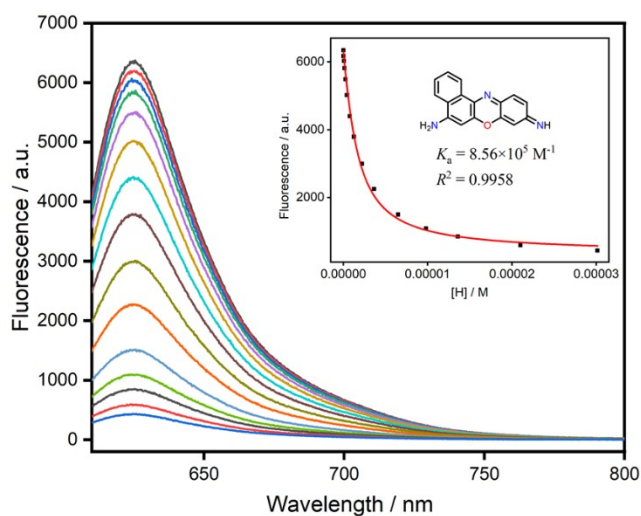

|         | $K_a$ ( $M^{-1}$ )            | $R^2$  |
|---------|-------------------------------|--------|
| 1 st    | $8.56 \times 10^5$            | 0.9958 |
| 2 nd    | $8.75 \times 10^5$            | 0.9956 |
| 3 rd    | $8.29 \times 10^5$            | 0.9955 |
| average | $(8.58 \pm 0.15) \times 10^5$ |        |

Fig. S22. Fluorescence titration of compound **Cresyl Violet** with **H1** in PB buffer (10 mM, pH = 7.4,  $[G] = 1 \mu M$ ;  $[H1] = 1 mM$ ). Fit of the titration data at  $\lambda_{em} = 624 nm$  to a single-site binding isotherm.

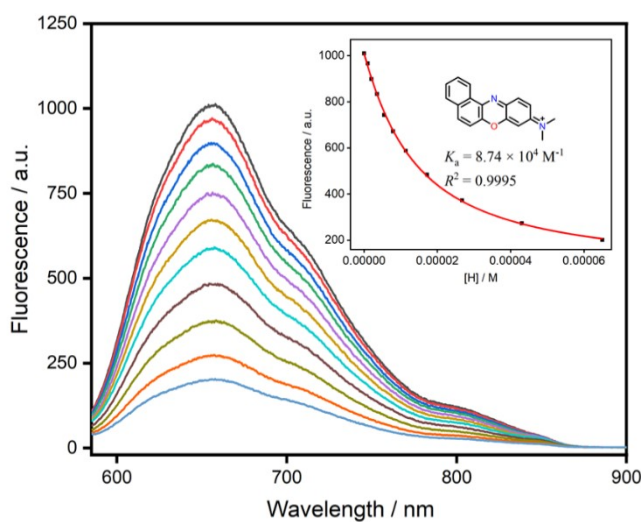

|         | $K_a$ ( $M^{-1}$ )            | $R^2$  |
|---------|-------------------------------|--------|
| 1 st    | $8.74 \times 10^4$            | 0.9995 |
| 2 nd    | $8.61 \times 10^4$            | 0.9989 |
| 3 rd    | $8.75 \times 10^4$            | 0.9998 |
| average | $(8.70 \pm 0.08) \times 10^4$ |        |

Fig. S23. Fluorescence titration of compound **Meldola's Blue** with **H1** in PB buffer (10 mM, pH = 7.4,  $[G] = 5 \mu M$ ;  $[H1] = 1 mM$ ). Fit of the titration data at  $\lambda_{em} = 655 nm$  to a single-site binding isotherm.



## 4. Computational Host-Guest Complex Structures

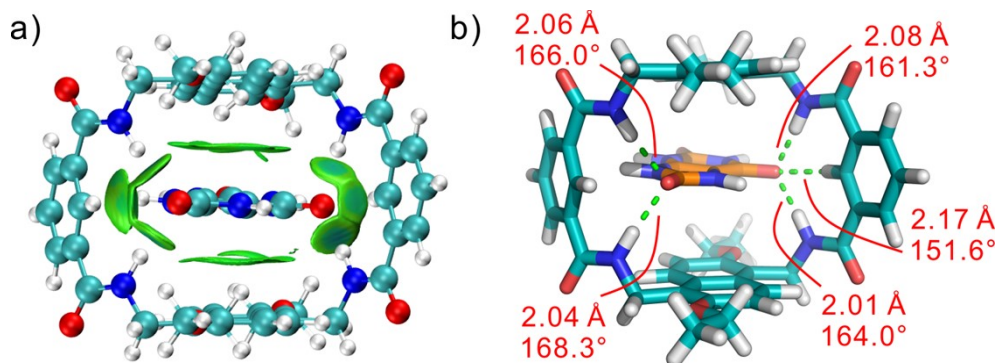

Fig. S24. Energy-minimized structures and IGMH ( $\delta g_{\text{inter}} = 0.005$ ) analysis of UA@H1 obtained by DFT ( $\omega$ B97XD/6-31G(d,p)) calculations with the SMD solution model in water.

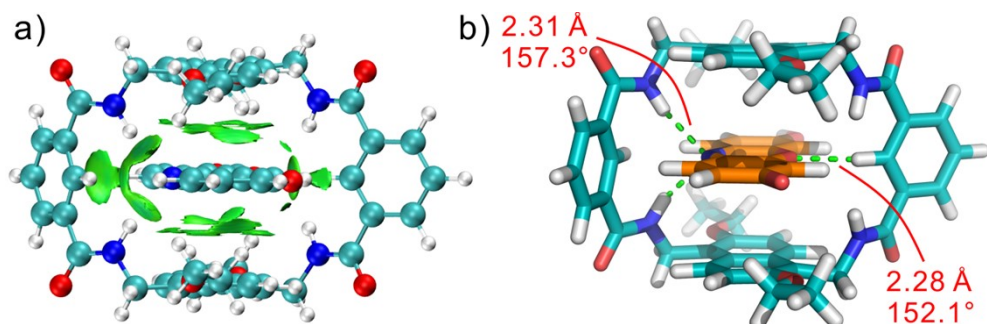

Fig. S25. Energy-minimized structures and IGMH ( $\delta g_{\text{inter}} = 0.005$ ) analysis of RF@H1 obtained by DFT ( $\omega$ B97XD/6-31G(d,p)) calculations with the SMD solution model in water.

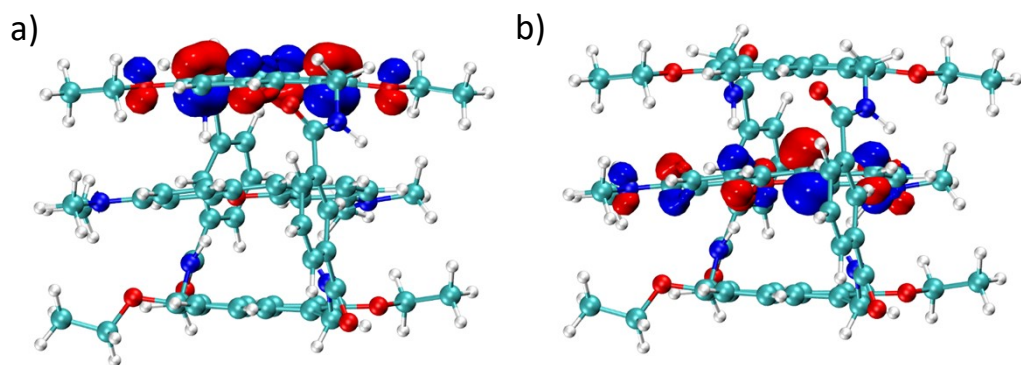

Fig. S26. DFT calculated a) HOMO and b) LUMO orbitals of PY@H1 (energy gap: 5.72 eV).

## 5. The Detection of Uric Acid

Table S2. Changes in UV absorption and fluorescence intensity of dyes at the



### titration of H1 or UA.

| Dye                   | + H1                       |                               | UA response (%) <sup>c</sup> | I <sub>1</sub> /I <sup>d</sup> |
|-----------------------|----------------------------|-------------------------------|------------------------------|--------------------------------|
|                       | $\Delta$ (nm) <sup>a</sup> | I/I <sub>0</sub> <sup>b</sup> |                              |                                |
| Proflavine            | 10                         | 0.3                           | 41                           | 1.4                            |
| Pyronin Y             | 9                          | 0.1                           | 46                           | 4.6                            |
| Riboflavin            | 11                         | 0.1                           | 25                           | 2.5                            |
| Methylene Blue        | 8                          | 0.1                           | 36                           | 3.6                            |
| Resorufin             | 30                         | 0.1                           | 94                           | 9.4                            |
| Brilliant Cresyl Blue | 35                         | 0.1                           | 39                           | 3.9                            |
| Cresyl Violet         | 35                         | 0.1                           | 47                           | 4.7                            |
| Meldola's Blue        | 20                         | 0.2                           | 32                           | 1.6                            |

<sup>a</sup>) The red shift value of the dye in UV-vis spectra after the addition of saturated macrocycle H1. <sup>b</sup>) I<sub>0</sub> and I are the fluorescence intensities of the dye before and after addition of H1. <sup>c</sup>) The fluorescence intensity recovery percentage of dye@H1 compared to dye upon adding saturated UA. <sup>d</sup>) I and I<sub>1</sub> are the fluorescence intensities of dye@H1 before and after addition of UA.

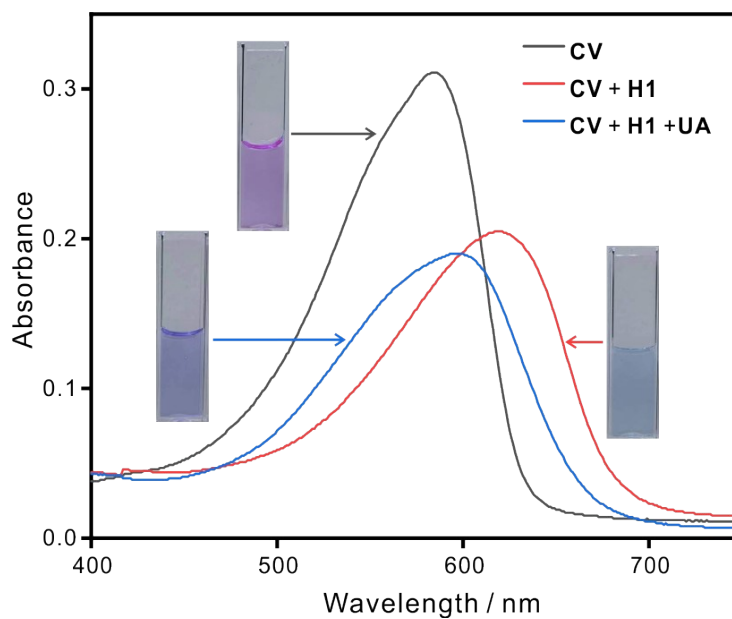

Fig. S27. UV-vis absorption spectra of CV, CV + H1, and CV + H1 + UA. 10 mM PB buffer, pH 7.4, 25 °C, [CV] = 25  $\mu$ M, [H1] = 20  $\mu$ M, [UA] = 480  $\mu$ M.

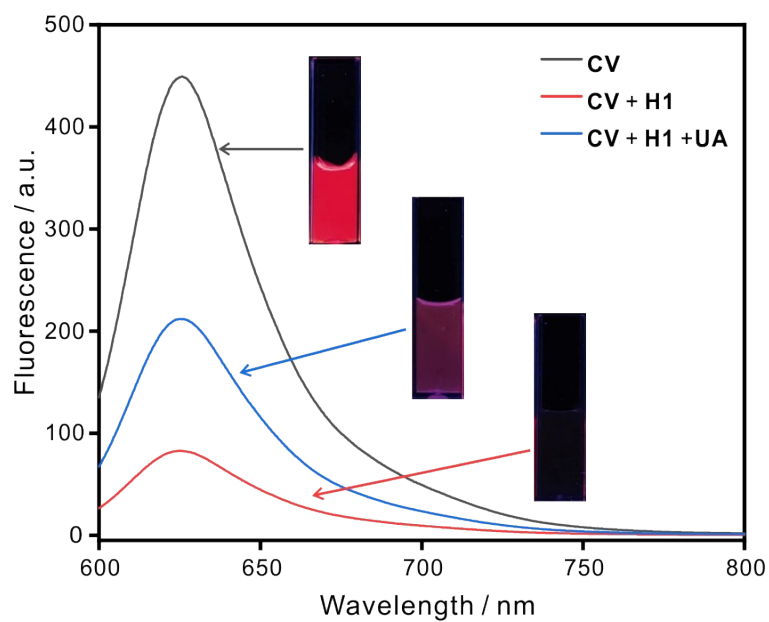

Fig. S28. Fluorescence spectra of **CV**, **CV + H1**, and **CV + H1 + UA**. 10 mM PB buffer, pH 7.4, 25 °C, [CV] = 5  $\mu$ M, [H1] = 10  $\mu$ M, [UA] = 360  $\mu$ M.

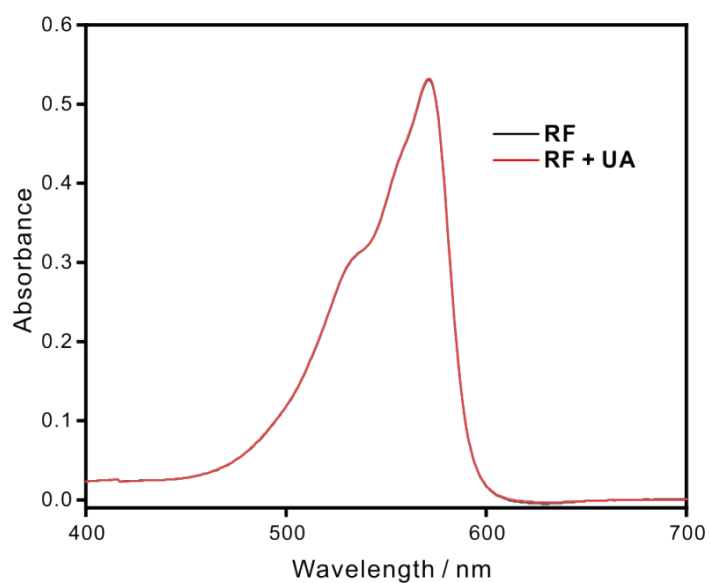

Fig. S29. UV-vis spectra of **RF**, **RF with UA**. 10 mM PB buffer, pH 7.4, 25 °C, [RF] = 10  $\mu$ M, [UA] = 500  $\mu$ M.

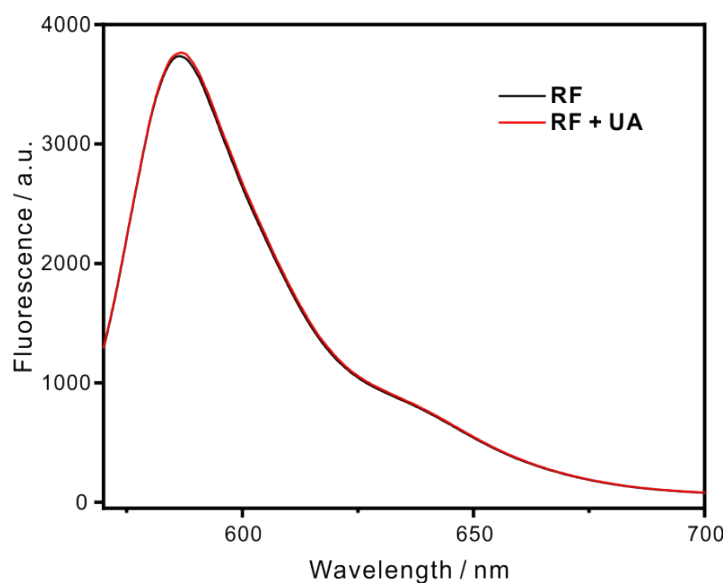

Fig. S30. Fluorescence spectra of **RF**, **RF** with **UA**. 10 mM PB buffer, pH 7.4, 25 °C, [**RF**] = 2  $\mu$ M, [**UA**] = 100  $\mu$ M.

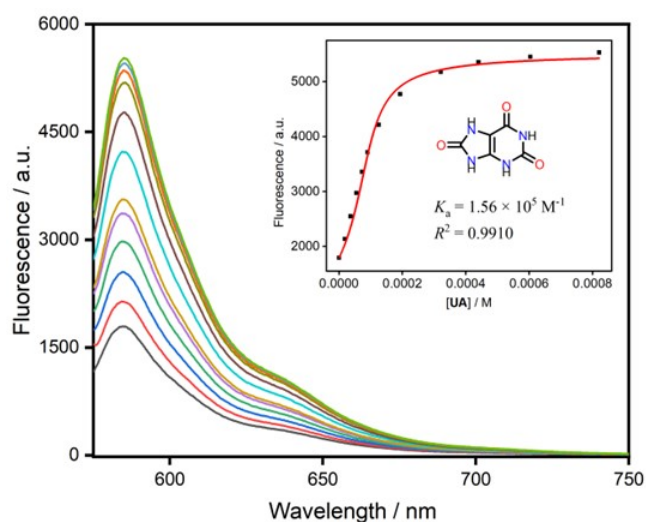

|         | $K_a$ ( $M^{-1}$ )            | $R^2$  |
|---------|-------------------------------|--------|
| 1 st    | $1.56 \times 10^5$            | 0.9910 |
| 2 nd    | $1.42 \times 10^5$            | 0.9913 |
| 3 rd    | $1.56 \times 10^5$            | 0.9955 |
| average | $(1.51 \pm 0.08) \times 10^5$ |        |

Fig. S31. Competitive titration in the **RF@HI** (2  $\mu$ M/90  $\mu$ M) reporter pair performed with **UA** up to 0.8 mM in PB buffer (10 mM, pH = 7.4, 10 mM). Fit of the titration data at  $\lambda_{em} = 586$  nm to a single-site binding isotherm.

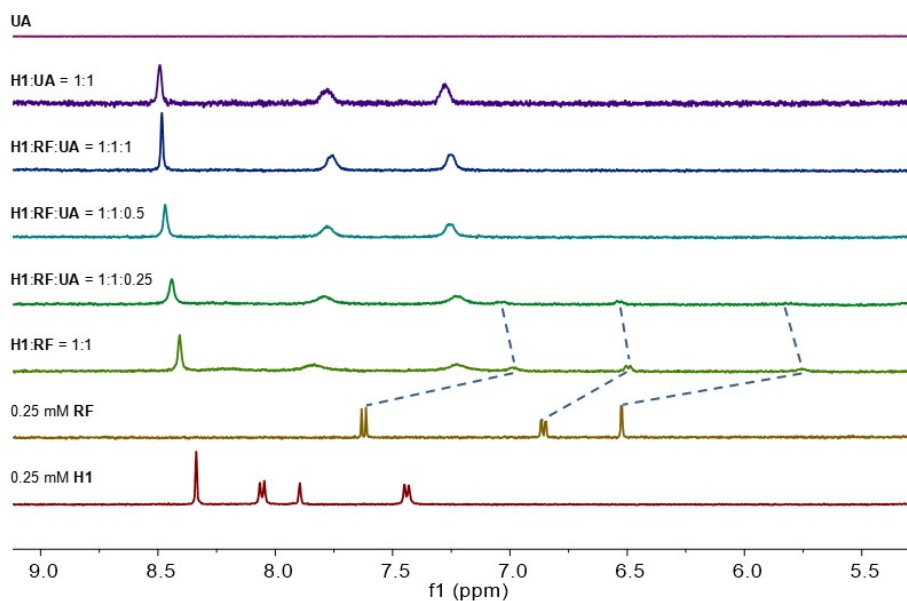

Fig. S32. Partial  $^1\text{H}$  NMR spectra (500 MHz,  $\text{D}_2\text{O}$ , 25  $^\circ\text{C}$ ) of **H1**, **RF**, **UA**, the equimolar mixture of **H1** and **UA**, the equimolar mixture of **H1** and **RF** after gradually adding **UA**.

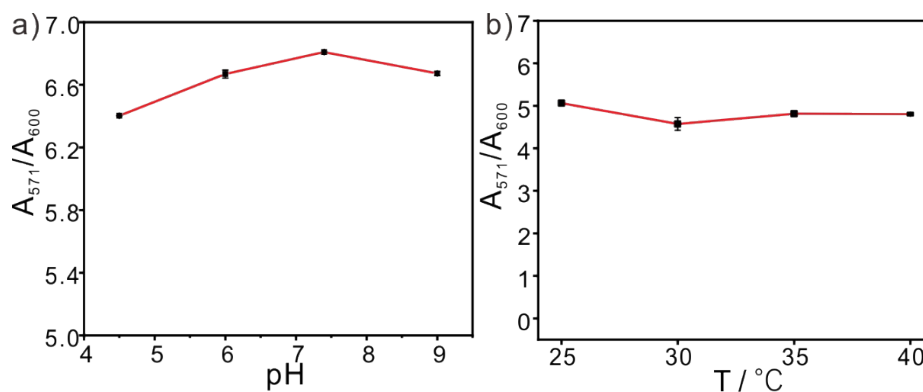

Fig. S33. Optimization of experimental parameters by UV. a) Effect of pH. **RF@H1** = 10/95  $\mu\text{M}$ , **UA** = 134  $\mu\text{M}$ , 25  $^\circ\text{C}$ . b) Effect of temperature. **RF@H1** = 10/95  $\mu\text{M}$ , **UA** = 134  $\mu\text{M}$ , pH 7.4.

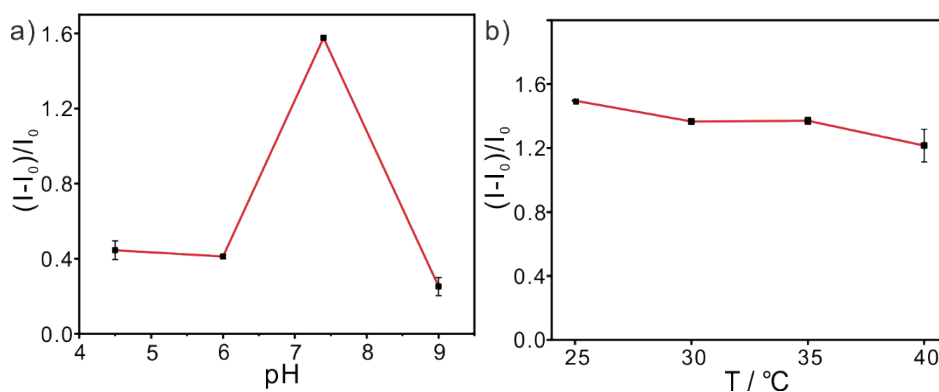

Fig. S34. Optimization of experimental parameters by Fluorescence. a) Effect of pH. **RF@H1** = 2/90  $\mu\text{M}$ , **UA** = 90  $\mu\text{M}$ , 25  $^\circ\text{C}$ . b) Effect of temperature. **RF@H1** = 2/90  $\mu\text{M}$ , **UA** = 90  $\mu\text{M}$ , pH 7.4.

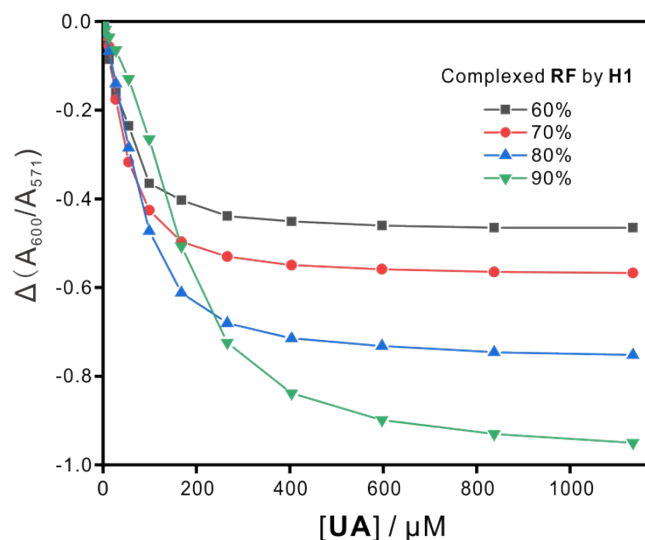

Fig. S35. The initial concentration of the indicator is  $[\mathbf{RF}]_0 = 10 \mu\text{M}$  in each assay. The initial concentrations of the host are  $[\mathbf{H1}]_0 = 39 \mu\text{M}$ ,  $57 \mu\text{M}$ ,  $95 \mu\text{M}$  and  $200 \mu\text{M}$  respectively, which correspond to the presence of 60%, 70%, 80% and 90% complexed  $\mathbf{RF@H1}$ .  $[\mathbf{RF}]/[\mathbf{H1}] = 10 \mu\text{M}/95 \mu\text{M}$  was selected because of its strong response and high sensitivity.

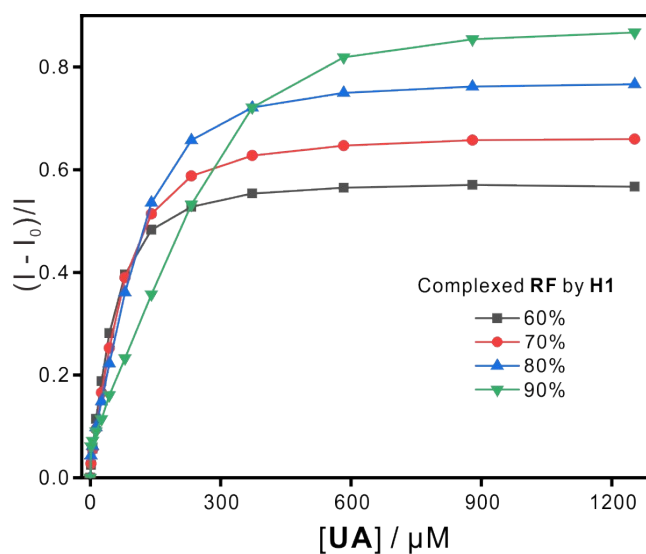

Fig. S36. Indicator displacement isotherms calculated from the binding constants  $K_{\mathbf{RF-H1}} = 4.0 \times 10^4 \text{ M}^{-1}$ . The initial concentration of the indicator is  $[\mathbf{RF}]_0 = 2 \mu\text{M}$  in each assay, the initial concentrations of the host are  $[\mathbf{H1}]_0 = 38 \mu\text{M}$ ,  $60 \mu\text{M}$ ,  $90 \mu\text{M}$  and  $200 \mu\text{M}$  respectively, which correspond to the presence of 60%, 70%, 80% and 90% complexed  $\mathbf{RF@H1}$ .  $[\mathbf{RF}]/[\mathbf{H1}] = 2 \mu\text{M}/90 \mu\text{M}$  was selected because of its strong response and high sensitivity.

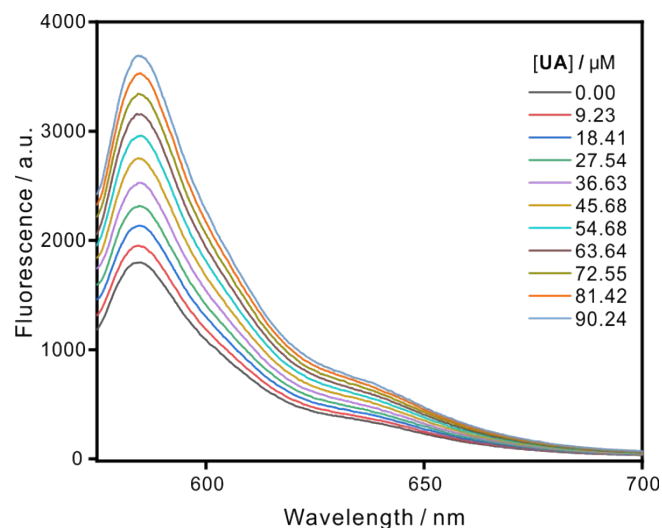

Fig. S37. Competitive titration in the **RF@HI** (2  $\mu\text{M}$ /90  $\mu\text{M}$ ) reporter pair performed with **UA** up to 90.24  $\mu\text{M}$  at  $\lambda_{\text{ex}} = 570 \text{ nm}$  and  $\lambda_{\text{em}} = 586 \text{ nm}$ .

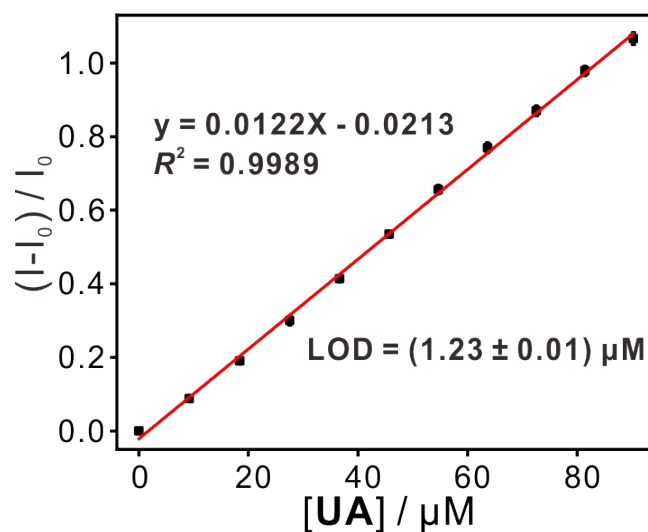

Fig. S38. The limit of detection (LOD) for **UA** in PB buffer solution (10 mM, pH = 7.4). The plot of  $(I - I_0) / I_0$  against **UA** concentration in 10 mM PB buffer solution (10 mM, pH = 7.4, 25  $^{\circ}\text{C}$ ) with  $I_0$  and  $I$  assigned as the fluorescence intensities of the **RF@HI** (2  $\mu\text{M}$ /90  $\mu\text{M}$ ) reporter pair in the absence and presence of **UA** (0–90.24  $\mu\text{M}$ ) respectively.

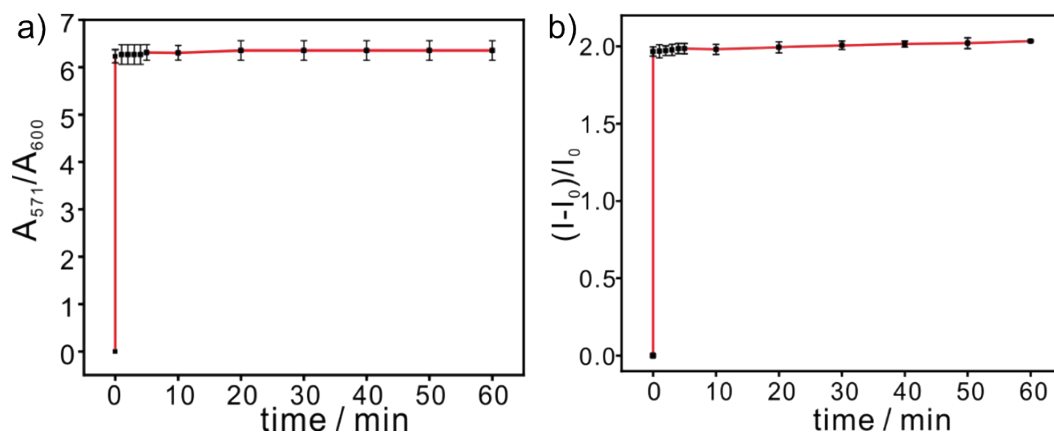

Fig. S39. a) UV and b) Fluorescence responses of the **RF@H1** (10  $\mu\text{M}$ /95  $\mu\text{M}$  and 2  $\mu\text{M}$ /90  $\mu\text{M}$  respectively) with time upon addition of UA (134  $\mu\text{M}$  and 90  $\mu\text{M}$  respectively).  $I_0$  and  $I$  assigned as the fluorescence intensities of the **RF@H1** reporter pair in the absence and presence of UA. 10 mM PB buffer, pH 7.4, 25  $^{\circ}\text{C}$ .

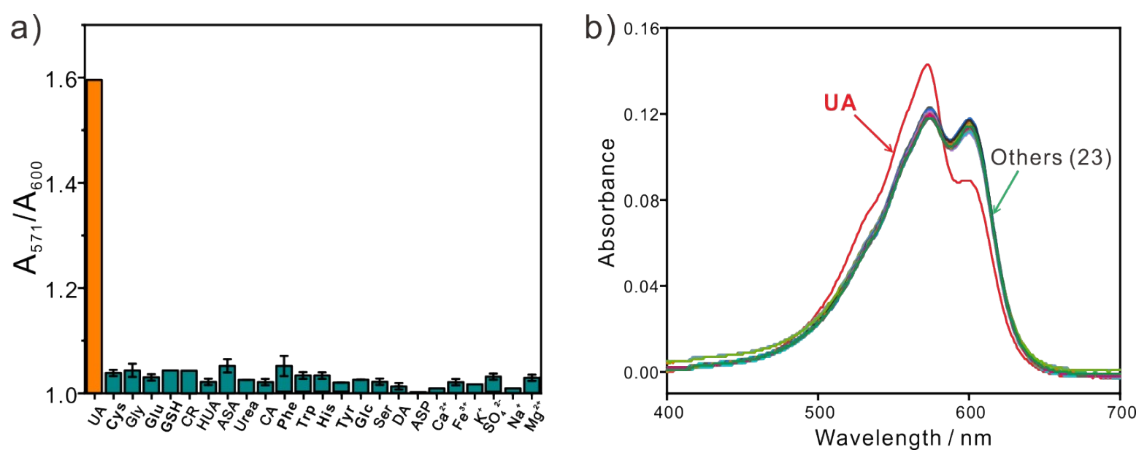

Fig. S40. UV responses of the **RF@H1** solution upon addition of UA or endogenous substances. 10 mM PB buffer, pH 7.4, 25  $^{\circ}\text{C}$ ,  $[\text{RF}] = 10 \mu\text{M}$ ,  $[\text{H1}] = 95 \mu\text{M}$ , 50  $\mu\text{M}$  for UA, Cys, Gly, Glu, GSH, CR, HUA, ASA, Urea, CA, Phe, Trp, His, Tyr, Glc, Ser, DA, ASP, 100  $\mu\text{M}$  for  $\text{Ca}^{2+}$ ,  $\text{Fe}^{3+}$ ,  $\text{K}^+$ ,  $\text{SO}_4^{2-}$ ,  $\text{Na}^+$  and  $\text{Mg}^{2+}$ , respectively.

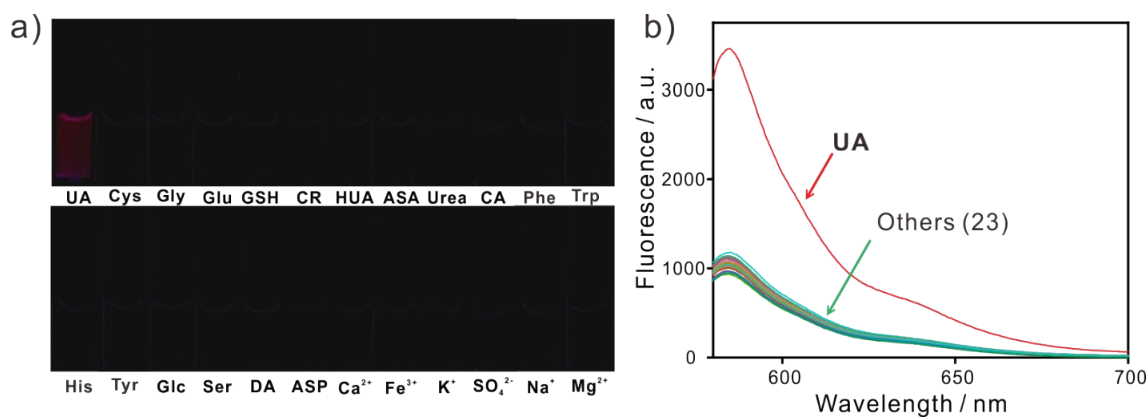

Fig. S41. a) the color change and b) Fluorescence responses of the **RF@H1** solution upon addition of **UA** or endogenous substances. 10 mM PB buffer, pH 7.4, 25 °C, [**RF**] = 2 μM, [**H1**] = 90 μM, 0.4 mM for **UA, Cys, Gly, Glu, GSH, CR, HUA, ASA, Urea, CA, Phe, Trp, His, Tyr, Glc, Ser, DA, ASP**, 4 mM for **Ca<sup>2+</sup>, Fe<sup>3+</sup>, K<sup>+</sup>, SO<sub>4</sub><sup>2-</sup>, Na<sup>+</sup> and Mg<sup>2+</sup>**, respectively.

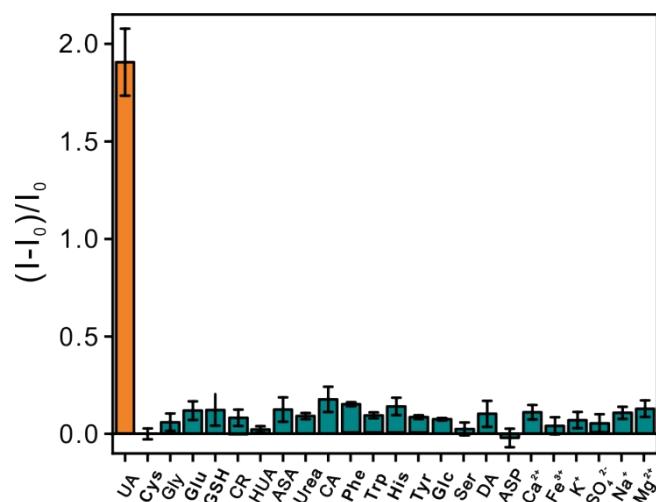

Fig. S42. Fluorescence responses of the **RF@H1** solution upon addition of **UA** or endogenous substances.  $I_0$  and  $I$  assigned as the fluorescence intensities of the **RF@H1** reporter pair in the absence and presence of **UA** or endogenous substances. 10 mM PB buffer, pH 7.4, 25 °C, [**RF**] = 10 μM, [**H1**] = 95 μM, 0.4 mM for **UA, Cys, Gly, Glu, GSH, CR, HUA, ASA, Urea, CA, Phe, Trp, His, Tyr, Glc, Ser, DA, ASP**, 4 mM for **Ca<sup>2+</sup>, Fe<sup>3+</sup>, K<sup>+</sup>, SO<sub>4</sub><sup>2-</sup>, Na<sup>+</sup> and Mg<sup>2+</sup>**, respectively.



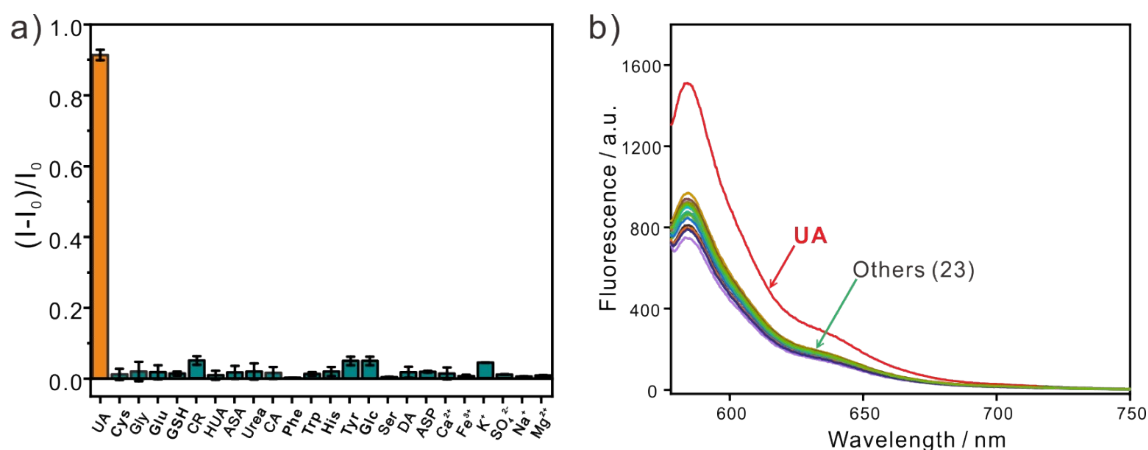

Fig. S43. Fluorescence responses of the **RF@H1** solution upon addition of **UA** or endogenous substances.  $I_0$  and  $I$  assigned as the fluorescence intensities of the **RF@H1** reporter pair in the absence and presence of **UA** or endogenous substances. 10 mM PB buffer, pH 7.4, 25 °C,  $[RF] = 2 \mu M$ ,  $[H1] = 90 \mu M$ , 50  $\mu M$  for **UA**, **Cys**, **Gly**, **Glu**, **GSH**, **CR**, **HUA**, **ASA**, **Urea**, **CA**, **Phe**, **Trp**, **His**, **Tyr**, **Glc**, **Ser**, **DA**, **ASP**, 100  $\mu M$  for  $Ca^{2+}$ ,  $Fe^{3+}$ ,  $K^+$ ,  $SO_4^{2-}$ ,  $Na^+$  and  $Mg^{2+}$ , respectively.

**Table S5: Comparison of the developed methods with some other optical methods for determination of uric acid.**

| Method                                 | Type                          | Linear range ( $\mu M$ ) | LOD ( $\mu M$ )      | Reaction time (min) | Ref        |
|----------------------------------------|-------------------------------|--------------------------|----------------------|---------------------|------------|
| Th-MOF-based method                    |                               | 4-70                     | 1.15                 | 18                  | [3]        |
| Heme-ficin complex-based method        |                               | 1-120                    | 2.5                  | 210                 | [4]        |
| $Cu^{2+}$ -TMB- $H_2O_2$ -based method | Colorimetric                  | 1-100                    | 6.4                  | 75                  | [5]        |
| Ag nanoprism-based method              |                               | 1-40                     | 7.0                  | 40                  | [6]        |
| Unmodified Ag nanoprism-based method   |                               | 0.01-3                   | 1.0                  | 15                  | [7]        |
| Ag@Au NR-based method                  |                               | 0.1-1                    | 6.5                  | 2                   | [8]        |
| Postfunctionalized MOF-based method    |                               | 0.01-400                 | $2.3 \times 10^{-3}$ | 1                   | [9]        |
| S, N co-doped C-dots-based method      | Fluorescence                  | 0.08-10/10-50            | 0.07                 | 45                  | [10]       |
| DC-biased optofluidic biolaser method  |                               | /                        | 3.63                 | 20                  | [11]       |
| GC5A·F1 complex-based method           |                               | 0-47.64                  | 1.65                 | Immediately         | [12]       |
| Upconversion NP-based method           | colorimetric and fluorometric | 10-1000                  | 5.79                 | 30                  | [13]       |
| B,N-carbon dots-based method           |                               | 100-400/1-500            | 0.9/1                | 20                  | [14]       |
| Tetralactam macrocycle based method    | dual-mode                     | 0-90/37-134              | 1.23/0.33            | Immediately         | This study |

## 6. Testing of Real Urine Samples

### 6.1 Detection of Sample by HPLC

UA concentrations in real urine samples were all tested twice by HPLC, the average values and standard deviations are given in Table S3. Errors are smaller than  $\pm 10\%$ .

**Table S3. Uric acid concentrations in real urine samples measured by HPLC.**

| Samples | UA (mM)         | Samples | UA (mM)         |
|---------|-----------------|---------|-----------------|
| 1       | 2.20 $\pm$ 0.22 | 10      | 3.25 $\pm$ 0.17 |
| 2       | 3.35 $\pm$ 0.05 | 11      | 1.66 $\pm$ 0.11 |
| 3       | 6.35 $\pm$ 0.01 | 12      | 6.79 $\pm$ 0.33 |
| 4       | 3.14 $\pm$ 0.01 | 13      | 0.87 $\pm$ 0.00 |
| 5       | 1.37 $\pm$ 0.03 | 14      | 7.06 $\pm$ 0.04 |
| 6       | 4.24 $\pm$ 0.18 | 15      | 1.40 $\pm$ 0.01 |
| 7       | 3.32 $\pm$ 0.01 | 16      | 1.13 $\pm$ 0.03 |
| 8       | 0.88 $\pm$ 0.07 | 17      | 9.42 $\pm$ 0.30 |
| 9       | 7.69 $\pm$ 0.28 | 18      | 5.20 $\pm$ 0.28 |

### 6.2 Detection of Sample by Paper Strips

Firstly, **RF@H1** loaded paper strips were prepared. PB buffer (10 mM, pH 7.4) was selected as the solvent to dissolve **RF** and **H1**. 300  $\mu$ L 50  $\mu$ M **RF** was dropped on the paper strips, dried at 60  $^{\circ}$ C. Then 300  $\mu$ L 100  $\mu$ M **H1** was dropped on the paper strips which was also dried at 60  $^{\circ}$ C subsequently. Its linear range and LOD were tested.

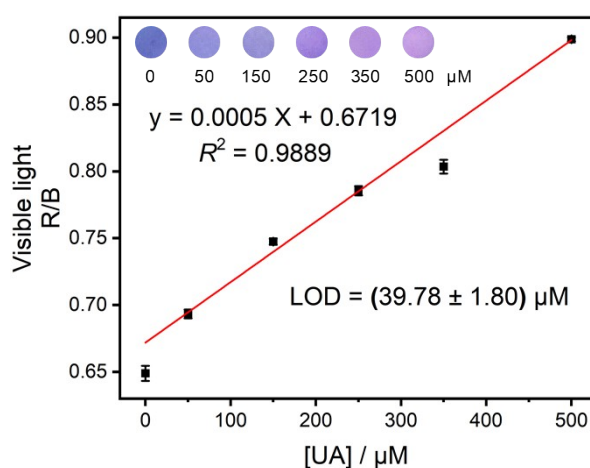

Fig. S44. Digital images of the paper strips in the presence of different concentrations of UA under visible light. The linear relationship between R/B value and concentrations of UA at 0 - 500  $\mu$ M.

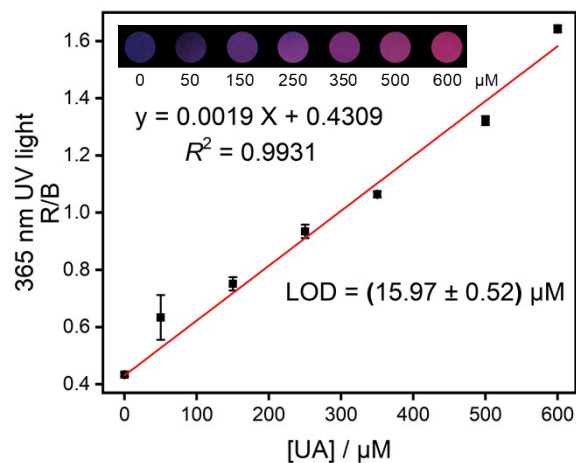

Fig. S45. Digital images of the paper strips in the presence of different concentrations of UA under 365 nm UV light. The linear relationship between R/B value and concentrations of UA at 0 - 600  $\mu\text{M}$ .

Then we detected the UA levels of the real samples by using the prepared paper strips. The pretreated urine sample were diluted 20 times with PB buffer (10 mM, pH 7.4). At last, 18 groups of diluted urine samples were dropped on the paper strips respectively and dried in the oven. The colors of paper strips under visible light and 365 nm UV light were recorded with a camera. The following is the relationship between the normalized R/B value of paper strips and UA level determined by HPLC.

**Table S4. The relationship between UA level determined by HPLC and the normalized R/B value of paper strips.**

|                      |                               | UA (mM) | visible light<br>R/B | 365 nm<br>R/B |
|----------------------|-------------------------------|---------|----------------------|---------------|
| visible light<br>R/B | Pearson corr.<br>( <i>r</i> ) | 0.9664  | --                   | 0.9034        |
|                      | <i>p</i> -value               | < 0.001 | --                   | < 0.001       |
| 365 nm<br>R/B        | Pearson corr.<br>( <i>r</i> ) | 0.9346  | 0.9034               | --            |
|                      | <i>p</i> -value               | < 0.001 | < 0.001              | --            |

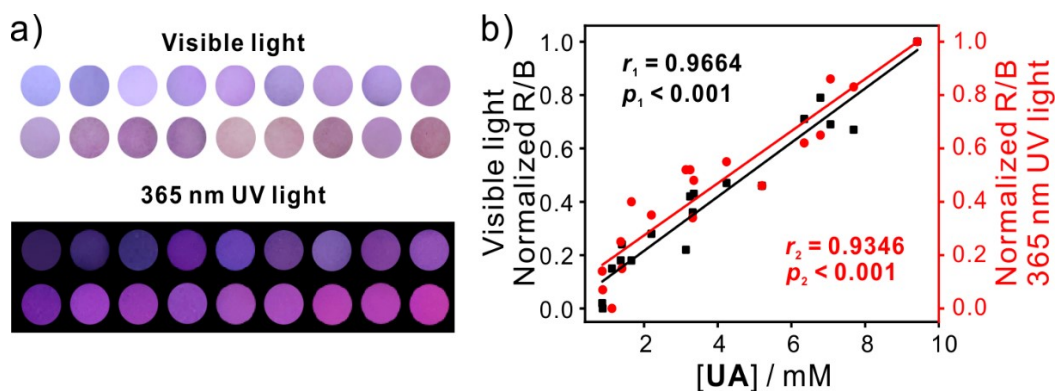

Fig. S46. a) The images of **RF@H1**-loaded paper strips after treatment with the diluted urine from 18 volunteers (arranged from low to high **UA** level) under visible and 365 nm UV light; b) strong positive correlations between **UA** level determined by HPLC and the normalized R/B value of paper strips recorded under visible ( $r_1$ ,  $p_1$ ) and 365 nm UV light ( $r_2$ ,  $p_2$ ).

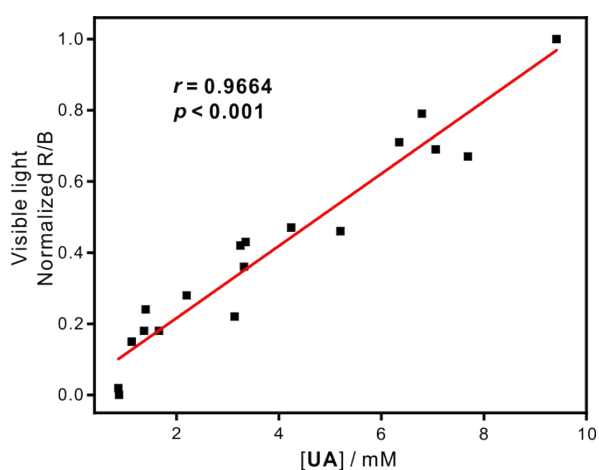

Fig. S47. A high-positive correlation (Pearson correlation coefficient,  $r = 0.9664$ ,  $p < 0.001$ ) of **UA** level determined by HPLC and the normalized value of R/B (the paper strips recorded under visible light).

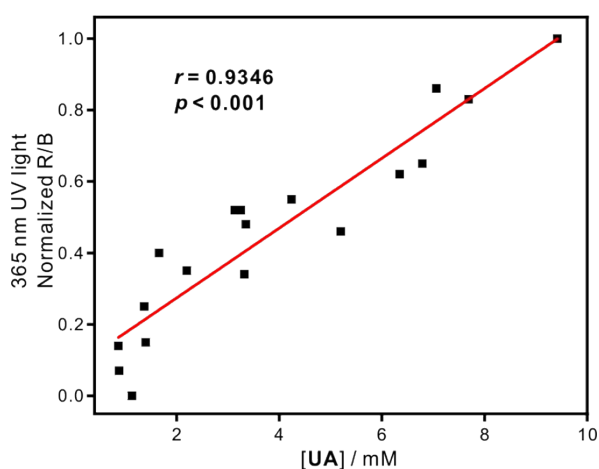

Fig. S48. A high-positive correlation (Pearson correlation coefficient,  $r = 0.9346$ ,  $p < 0.001$ ) of **UA** level determined by HPLC and the normalized value of R/B (the paper strips recorded under 365 nm UV light).

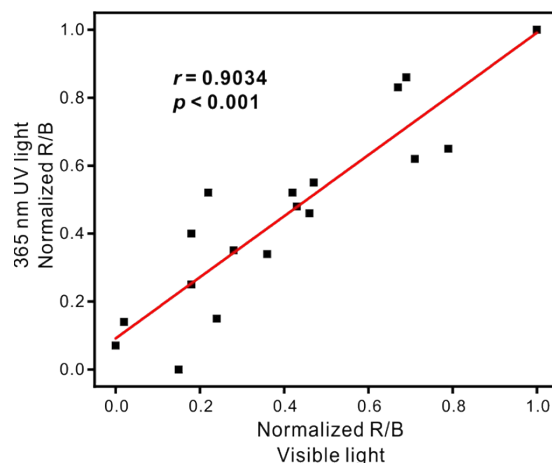

Fig. S49. A high-positive correlation (Pearson correlation coefficient,  $r = 0.9034$ ,  $p < 0.001$ ) between the normalized value of R/B value of paper strips recorded under visible light and 365 nm UV light.

## 7. Computational Data

The calculations were performed using Gaussian 09 package.<sup>[15]</sup> The geometries of complexes **RF@H1**, **UA@H1** and **PY@H1** have been optimized employing density functional theory (DFT) with dispersion corrected method ( $\omega$ B97XD)<sup>[16]</sup> in combination with 6-31G(d,p) basis set. Geometry optimizations were performed by considering the solvent effects (SMD, water) without applying any geometry Constraints. Minima were characterized by the absence of imaginary frequencies. Independent gradient model based on Hirshfeld partition (IGMH) analysis were carried out with Multiwfn 3.7 program.<sup>[17]</sup> Molecular plots were visualized by the VMD 1.9.3 program.<sup>[18]</sup>

There is no imaginary frequency after optimization and frequency analysis.

### RF@H1

|   |              |               |               |
|---|--------------|---------------|---------------|
| H | 4.9031690495 | 0.2178124923  | -1.9914171769 |
| C | 4.7922172906 | 0.2508740077  | -0.9150621179 |
| H | 4.8637724738 | 2.3592992743  | -0.8932776571 |
| C | 4.7624003340 | 1.4664787508  | -0.2870670150 |
| C | 4.5749614458 | -0.9057970739 | 1.2104657590  |
| C | 4.5836899431 | 1.5693099489  | 1.1172373214  |
| C | 4.6758868248 | -0.9472866072 | -0.1694369021 |
| C | 4.4920232491 | 0.3604196759  | 1.8658440116  |
| C | 4.4925349776 | 2.8348844439  | 1.7708543821  |
| H | 4.2903792729 | -0.4200233581 | 3.8907101052  |
| C | 4.2054862267 | 2.8774078377  | 3.1232390186  |
| C | 4.1435469432 | 1.6820592438  | 3.8794680553  |
| H | 3.9746009005 | 1.7167602249  | 4.9482204299  |
| C | 4.3086821147 | 0.4675683928  | 3.2705739594  |
| O | 4.0015651910 | 4.1039721873  | 3.6781934944  |

|   |               |               |               |
|---|---------------|---------------|---------------|
| O | 4.6601241827  | -2.1728803255 | -0.7637415125 |
| C | 3.7888647403  | 4.2037417775  | 5.0884117934  |
| H | 2.9364574975  | 3.5817280979  | 5.3822092568  |
| H | 4.6782633757  | 3.8458815743  | 5.6202294299  |
| C | 4.7701326257  | -2.2570223749 | -2.1862681478 |
| H | 3.9971036624  | -1.6408295664 | -2.6586757901 |
| H | 5.7503308647  | -1.8813838321 | -2.5027451590 |
| C | 4.5918179871  | -3.7090699703 | -2.5642518550 |
| H | 3.6090249085  | -4.0711709652 | -2.2487511163 |
| H | 5.3610716325  | -4.3323282464 | -2.1003125280 |
| H | 4.6680241878  | -3.8156702844 | -3.6494051220 |
| C | 3.5111385302  | 5.6569707432  | 5.3966024326  |
| H | 2.6159508095  | 5.9955228868  | 4.8680772809  |
| H | 4.3549356604  | 6.2880008441  | 5.1044505679  |
| H | 3.3444908080  | 5.7774933735  | 6.4700918147  |
| C | 4.7436621961  | 4.1186053139  | 1.0179911090  |
| H | 4.9485063011  | 4.9196209765  | 1.7298064763  |
| H | 5.6246581537  | 4.0176954791  | 0.3831575837  |
| C | 4.5582647523  | -2.1868101146 | 2.0080875720  |
| H | 4.7899247577  | -3.0317270115 | 1.3587521858  |
| H | 5.3252402347  | -2.1577647252 | 2.7863512292  |
| H | -1.9116954433 | 0.1080527726  | -2.9397439559 |
| C | -2.0998552877 | 0.1398707801  | -1.8741328369 |
| H | -2.2412115168 | 2.2448669107  | -1.8819761983 |
| C | -2.2810036479 | 1.3530381904  | -1.2671963512 |
| C | -2.4345938277 | -1.0186924694 | 0.2350466613  |
| C | -2.4957325412 | 1.4552892770  | 0.1320958078  |
| C | -2.1536724819 | -1.0572830006 | -1.1198085472 |
| C | -2.5737389862 | 0.2466190151  | 0.8826033986  |
| C | -2.6264761950 | 2.7202261595  | 0.7802038795  |
| H | -2.9078980987 | -0.5359582982 | 2.8890292646  |
| C | -2.7209599172 | 2.7658509919  | 2.1593850244  |
| C | -2.8300578685 | 1.5697428638  | 2.9090516668  |
| H | -2.9604323507 | 1.6050650758  | 3.9831714914  |
| C | -2.7842679541 | 0.3533298466  | 2.2835500061  |
| O | -2.7151152561 | 3.9957938128  | 2.7435295783  |
| O | -1.9375793877 | -2.2791424670 | -1.6818491260 |
| C | -2.8986799588 | 4.0960326613  | 4.1578022809  |
| H | -3.8877005729 | 3.7079187721  | 4.4282272985  |
| H | -2.1396264519 | 3.4999730531  | 4.6758435841  |
| C | -1.6524095841 | -2.3604633800 | -3.0800010714 |
| H | -2.5203611990 | -2.0145910065 | -3.6536585445 |
| H | -0.7996568053 | -1.7180858472 | -3.3261720270 |
| C | -1.3319131862 | -3.8044771606 | -3.3885724132 |

|   |               |               |               |
|---|---------------|---------------|---------------|
| H | -2.1785012870 | -4.4537600682 | -3.1494865665 |
| H | -0.4616278108 | -4.1367326065 | -2.8152053702 |
| H | -1.1056204658 | -3.9086601919 | -4.4528402957 |
| C | -2.7616764075 | 5.5559412348  | 4.5237049023  |
| H | -3.5131852426 | 6.1612774519  | 4.0095572269  |
| H | -1.7673782632 | 5.9249253025  | 4.2581123513  |
| H | -2.8982650020 | 5.6769479953  | 5.6013771814  |
| C | -2.7029945019 | 3.9986699941  | -0.0182531139 |
| H | -3.1195528347 | 4.7896773936  | 0.6070906042  |
| H | -3.3736102953 | 3.8727700115  | -0.8690021539 |
| C | -2.5957849474 | -2.3020327270 | 1.0125612610  |
| H | -3.5465864538 | -2.3006537308 | 1.5517865748  |
| H | -2.6145960894 | -3.1509836943 | 0.3283714039  |
| H | 1.7019781591  | 6.8710954007  | -4.7240773282 |
| C | 1.5859457679  | 6.2805245387  | -3.8218926231 |
| C | 1.2876365033  | 4.7711452203  | -1.5034868639 |
| C | 0.3188760531  | 5.8818213340  | -3.4115931267 |
| C | 2.7048459454  | 5.9202495943  | -3.0795719772 |
| C | 2.5592694166  | 5.1681085274  | -1.9127936102 |
| C | 0.1641327646  | 5.1295326279  | -2.2460903660 |
| H | -0.5578406498 | 6.1515836892  | -3.9898915838 |
| H | 3.6971431261  | 6.2201141533  | -3.3977866251 |
| H | 1.1770686977  | 4.1327084878  | -0.6350317416 |
| C | -1.2196716813 | 4.7104061211  | -1.8518346982 |
| C | 3.7954354214  | 4.7911790771  | -1.1539542972 |
| O | 4.8963485575  | 4.7530702755  | -1.7226068179 |
| O | -2.1217880281 | 4.6400366699  | -2.6992200536 |
| N | 3.6425560106  | 4.5206745608  | 0.1548717864  |
| H | 2.7316175658  | 4.5981855146  | 0.5815420981  |
| N | -1.4213816254 | 4.4391151437  | -0.5498036584 |
| H | -0.6644175111 | 4.5434892167  | 0.1089646889  |
| H | 0.1564634321  | -2.0627313271 | 7.4163029806  |
| C | 0.3058977477  | -2.3102826001 | 6.3710900068  |
| C | 0.6888821944  | -2.9480706822 | 3.6927055906  |
| C | -0.7932229487 | -2.4745259874 | 5.5331627554  |
| C | 1.5966161578  | -2.4360354098 | 5.8657223279  |
| C | 1.7903448252  | -2.7431879675 | 4.5183688478  |
| C | -0.6020243609 | -2.7817192944 | 4.1854572005  |
| H | -1.8012146628 | -2.3472585275 | 5.9131683644  |
| H | 2.4580632200  | -2.2786589028 | 6.5058708723  |
| H | 0.8373571106  | -3.2423416293 | 2.6597944049  |
| C | -1.7864690429 | -2.8428302334 | 3.2739784892  |
| C | 3.1799210072  | -2.7628419107 | 3.9650796379  |
| O | 4.1592193048  | -3.0420042557 | 4.6691077650  |

|   |               |               |               |
|---|---------------|---------------|---------------|
| O | -2.9114208087 | -3.1558834793 | 3.6851883677  |
| N | 3.2778227167  | -2.4080400569 | 2.6677277091  |
| H | 2.4609500454  | -1.9984260076 | 2.2305381479  |
| N | -1.5376926409 | -2.4855984026 | 1.9976216236  |
| H | -0.6458705175 | -2.0484642372 | 1.7982065674  |
| O | 1.0718039687  | 2.0820606694  | 0.3587642946  |
| C | 1.1117290754  | -0.3072582311 | 0.3483952752  |
| C | 0.8145570355  | 0.7568527193  | 2.3607719213  |
| N | 0.9232197457  | -0.3611583917 | 1.7092991663  |
| C | 0.8860222207  | 2.0589592404  | 1.6965025855  |
| C | 1.1867460902  | 0.9176452343  | -0.3324627010 |
| C | 0.7733302081  | 3.2258915621  | 2.3712685465  |
| C | 0.5738279657  | 3.2169307992  | 3.8059683877  |
| C | 0.5014907381  | 1.9053158777  | 4.4776048994  |
| C | 0.6148197401  | 0.7530545608  | 3.7965633776  |
| C | 1.3760137972  | 0.9902270333  | -1.7009786631 |
| C | 1.4934665349  | -0.2036762824 | -2.4068345063 |
| C | 1.4226837223  | -1.4502743848 | -1.7538934014 |
| C | 1.2339959833  | -1.4941256113 | -0.3928704930 |
| O | 0.4655480837  | 4.2650068651  | 4.4627843731  |
| O | 1.6779371651  | -0.1162353722 | -3.7425975213 |
| H | 0.8290827488  | 4.1807170651  | 1.8601078364  |
| H | 0.3518324123  | 1.9159416995  | 5.5518495018  |
| H | 0.5621496793  | -0.2123175752 | 4.2867934472  |
| H | 1.4306786544  | 1.9480711576  | -2.2046724401 |
| H | 1.5177481321  | -2.3646640899 | -2.3312132933 |
| H | 1.1760352115  | -2.4416104477 | 0.1333093926  |
| H | 1.7450265087  | -1.0021441647 | -4.1221794256 |

**PY@H1**

|   |              |              |             |
|---|--------------|--------------|-------------|
| H | 0.955943921  | -3.499679231 | 3.708147052 |
| C | 0.776480974  | -2.432204439 | 3.702379621 |
| H | 2.836206549  | -2.007678106 | 3.50418552  |
| C | 1.842063443  | -1.581638512 | 3.587373093 |
| C | -0.766156354 | -0.56227168  | 3.834798993 |
| C | 1.660887501  | -0.17475473  | 3.527855698 |
| C | -0.543506001 | -1.928186232 | 3.804393521 |
| C | 0.332768605  | 0.329101887  | 3.646835553 |
| C | 2.756739557  | 0.718836823  | 3.334227057 |
| H | -0.849414051 | 2.154028497  | 3.66189705  |
| C | 2.505917166  | 2.069466282  | 3.173855949 |
| C | 1.191145173  | 2.578502759  | 3.309788694 |
| H | 1.000500461  | 3.639815725  | 3.213358507 |



|   |              |              |              |
|---|--------------|--------------|--------------|
| C | 0.143774088  | 1.733190779  | 3.557488315  |
| C | -2.148205383 | -0.036260306 | 4.134036078  |
| H | -2.103000155 | 0.715849611  | 4.926205053  |
| H | -2.775323164 | -0.853926839 | 4.494870421  |
| C | 4.186297014  | 0.222903048  | 3.302350354  |
| H | 4.855352882  | 1.043187766  | 3.564466566  |
| H | 4.336548613  | -0.574892503 | 4.030085208  |
| N | -2.780134277 | 0.59995726   | 2.987558857  |
| H | -2.542319415 | 0.255325806  | 2.071534691  |
| N | 4.59058062   | -0.309560704 | 2.005692934  |
| H | 4.824202711  | 0.362383587  | 1.291469332  |
| C | -3.563955034 | 1.696075668  | 3.110608349  |
| C | 4.930345572  | -1.608515755 | 1.817174714  |
| O | -3.763366009 | 2.255106519  | 4.187771642  |
| O | 4.933626645  | -2.438004847 | 2.725666385  |
| C | -4.159577773 | 2.21780622   | 1.834772494  |
| C | -5.203340968 | 3.274896082  | -0.531516607 |
| C | -4.558173419 | 3.553770932  | 1.777320345  |
| C | -4.319177265 | 1.410200663  | 0.711947185  |
| C | -4.804334314 | 1.939362041  | -0.482417271 |
| C | -5.087907728 | 4.075694445  | 0.601060776  |
| H | -4.445362231 | 4.172180571  | 2.660767233  |
| H | -4.097091086 | 0.350572898  | 0.769582993  |
| H | -5.394491796 | 5.115173938  | 0.5612421    |
| H | -5.594370812 | 3.675626024  | -1.460319889 |
| H | -0.891580796 | 3.323144883  | -3.692675691 |
| C | -0.602892477 | 2.281245064  | -3.638038782 |
| H | -2.604599097 | 1.654549839  | -3.400274334 |
| C | -1.57313464  | 1.330589111  | -3.471463916 |
| C | 1.114023451  | 0.565742146  | -3.757039286 |
| C | -1.250849507 | -0.045816946 | -3.371269251 |
| C | 0.756614934  | 1.905237545  | -3.753322065 |
| C | 0.114659691  | -0.423720694 | -3.519009938 |
| C | -2.255115185 | -1.040304118 | -3.138256618 |
| H | 1.47251878   | -2.127349408 | -3.504835327 |
| C | -1.874698385 | -2.355233445 | -2.997444785 |
| C | -0.518840473 | -2.738444779 | -3.136949883 |
| H | -0.249442435 | -3.780278823 | -3.000587686 |
| C | 0.441616296  | -1.80654766  | -3.409590568 |
| C | 2.528985973  | 0.175218579  | -4.104128889 |
| H | 3.070642759  | 1.04970283   | -4.46642318  |
| H | 2.518980963  | -0.5566966   | -4.920592303 |
| C | -3.705287386 | -0.650917996 | -3.007909394 |
| N | 3.25151878   | -0.409173433 | -2.980006442 |

|   |              |              |              |
|---|--------------|--------------|--------------|
| H | 2.752898193  | -0.525160331 | -2.112343707 |
| N | -3.910990499 | 0.146255905  | -1.804236798 |
| H | -3.129284526 | 0.211880255  | -1.168181992 |
| C | 4.399325196  | -1.0998221   | -3.189671796 |
| C | -4.866516669 | 1.106665818  | -1.729222801 |
| O | 4.921846602  | -1.178692545 | -4.298397613 |
| O | -5.691550411 | 1.302965515  | -2.616164159 |
| C | 4.976966973  | -1.790404745 | -1.989828035 |
| C | 5.939507429  | -3.212976775 | 0.205785531  |
| C | 5.706869237  | -2.963236485 | -2.180769394 |
| C | 4.777327359  | -1.309592105 | -0.698341547 |
| C | 5.241813361  | -2.020892752 | 0.40683285   |
| C | 6.189378296  | -3.669253589 | -1.083576776 |
| H | 5.874470198  | -3.319655671 | -3.191087413 |
| H | 4.256386187  | -0.367894753 | -0.568254133 |
| H | 6.746557078  | -4.587390727 | -1.23367085  |
| H | 6.27908367   | -3.772248046 | 1.070143823  |
| H | -4.322111444 | -1.550565453 | -2.9726219   |
| H | -4.032083174 | -0.057710679 | -3.868620317 |
| O | -2.805059256 | -3.296690882 | -2.647498294 |
| C | -3.046300999 | -4.32386821  | -3.614470261 |
| H | -2.110811792 | -4.843809919 | -3.852687978 |
| O | 3.571148288  | 2.857545768  | 2.872250888  |
| O | -1.630805011 | -2.737300373 | 3.887965543  |
| C | 3.392607077  | 4.268024614  | 2.78278807   |
| H | 2.635940473  | 4.499320403  | 2.023651655  |
| H | 3.043458508  | 4.661049216  | 3.745643463  |
| C | -1.445563171 | -4.148043187 | 3.941238623  |
| H | -0.897210773 | -4.483251637 | 3.052068501  |
| H | -0.854103376 | -4.414535467 | 4.825788278  |
| O | 1.753098917  | 2.812114228  | -3.893339549 |
| C | 1.436576256  | 4.200434455  | -3.867730015 |
| H | 0.842279512  | 4.463994146  | -4.751155499 |
| H | 0.837804249  | 4.426042609  | -2.977206831 |
| C | 2.742931974  | 4.96303244   | -3.840448602 |
| H | 3.342997568  | 4.735567957  | -4.724826156 |
| H | 3.320066682  | 4.702464866  | -2.949275995 |
| H | 2.542585333  | 6.037313065  | -3.824448537 |
| H | -3.422942148 | -3.863948131 | -4.536798253 |
| C | -4.058071953 | -5.283253748 | -3.028756913 |
| H | -4.278600224 | -6.075601203 | -3.748178216 |
| H | -4.989157523 | -4.763499404 | -2.787969219 |
| H | -3.668457898 | -5.743381423 | -2.116948144 |
| C | -2.816970479 | -4.784570369 | 3.993397312  |

|   |              |              |              |
|---|--------------|--------------|--------------|
| H | -3.362145717 | -4.459511288 | 4.882718921  |
| H | -2.71825902  | -5.872508745 | 4.023588883  |
| H | -3.397994213 | -4.514043548 | 3.108363298  |
| C | 4.727714429  | 4.868047721  | 2.399599618  |
| H | 5.060778178  | 4.475859411  | 1.435239609  |
| H | 5.485625254  | 4.638283622  | 3.152558314  |
| H | 4.634782639  | 5.953805322  | 2.319365463  |
| C | -0.452588283 | 1.225822051  | -0.015154694 |
| C | 0.932643535  | 0.942856564  | 0.087822613  |
| O | -1.361203322 | 0.217144855  | 0.093301259  |
| C | -0.947785455 | 2.491178554  | -0.208162184 |
| C | 1.331049424  | -0.37683097  | 0.294052159  |
| C | 1.820289535  | 2.045118519  | -0.03042346  |
| C | -0.975116185 | -1.080416592 | 0.231969257  |
| C | -0.046123271 | 3.571750108  | -0.347988687 |
| C | 0.400737404  | -1.407597875 | 0.321039057  |
| C | 1.360148216  | 3.30784205   | -0.248786911 |
| C | -1.973571006 | -2.018503394 | 0.289153111  |
| N | -0.491645002 | 4.822494153  | -0.582466732 |
| C | 0.725425361  | -2.786641489 | 0.43828455   |
| C | -1.63430591  | -3.387783427 | 0.4004912    |
| C | 0.41964456   | 5.960379793  | -0.528169824 |
| C | -1.919219674 | 5.069693325  | -0.728344569 |
| C | -0.242763818 | -3.743106903 | 0.458942229  |
| N | -2.591775998 | -4.329150647 | 0.451617769  |
| H | -2.018802608 | 2.627827251  | -0.261634017 |
| H | 2.382202198  | -0.608386969 | 0.436488391  |
| H | 2.88791983   | 1.875301627  | 0.049278053  |
| H | 2.071964672  | 4.115246339  | -0.354601511 |
| H | -3.00197021  | -1.701703947 | 0.191503518  |
| H | 1.770747069  | -3.068098725 | 0.506564622  |
| H | -0.154952197 | 6.876699177  | -0.643450763 |
| H | 0.94204179   | 6.002773146  | 0.432506475  |
| H | 1.161209288  | 5.924559762  | -1.332515071 |
| H | -2.073383975 | 6.097926374  | -1.048484487 |
| H | -2.349281846 | 4.410738651  | -1.488441324 |
| H | -2.452187703 | 4.911299658  | 0.215301654  |
| H | 0.046631503  | -4.782489076 | 0.531761567  |
| C | -2.245365521 | -5.744859686 | 0.479593177  |
| H | -3.161275617 | -6.331165181 | 0.507560366  |
| H | -1.661076874 | -5.994491796 | 1.370453507  |
| H | -1.677359962 | -6.03214057  | -0.411035971 |
| C | -3.99407858  | -3.941926426 | 0.353778322  |
| H | -4.190434271 | -3.457621876 | -0.607940581 |

|   |              |              |             |
|---|--------------|--------------|-------------|
| H | -4.266957537 | -3.262915534 | 1.168121396 |
| H | -4.61543491  | -4.831555964 | 0.431365355 |

**UA@HI**

|   |              |              |              |
|---|--------------|--------------|--------------|
| H | 3.213456101  | 0.68653809   | 3.440069216  |
| C | 2.200944402  | 0.303647018  | 3.47577383   |
| H | 1.383501677  | 2.244059452  | 3.624293169  |
| C | 1.159079476  | 1.185682833  | 3.566095466  |
| C | 0.675715916  | -1.5875941   | 3.527543958  |
| C | -0.189003667 | 0.736989498  | 3.603482695  |
| C | 1.963142861  | -1.092459492 | 3.425724289  |
| C | -0.418339784 | -0.670181368 | 3.606969394  |
| C | -1.284434118 | 1.65187319   | 3.655249319  |
| H | -1.981852969 | -2.175583147 | 3.785842624  |
| C | -2.577784881 | 1.159858536  | 3.695967848  |
| C | -2.808076133 | -0.23638084  | 3.747052557  |
| H | -3.816663443 | -0.623271367 | 3.821034473  |
| C | -1.76137375  | -1.117677064 | 3.712596036  |
| C | 0.444067061  | -3.083318376 | 3.57841967   |
| H | -0.146935314 | -3.352412073 | 4.456860715  |
| H | 1.405628949  | -3.592774096 | 3.654885481  |
| C | -1.055343774 | 3.144897717  | 3.689412772  |
| H | -2.004801273 | 3.654772934  | 3.85679848   |
| H | -0.387820308 | 3.416506061  | 4.511550121  |
| N | -0.285549853 | -3.57767948  | 2.420707569  |
| H | 0.059922735  | -3.29178801  | 1.513196262  |
| N | -0.433501486 | 3.638922917  | 2.467663097  |
| H | -0.692350952 | 3.182057886  | 1.597822622  |
| C | -1.451196453 | -4.254582048 | 2.523921603  |
| C | 0.651559643  | 4.443983575  | 2.507674796  |
| O | -1.94669401  | -4.57295079  | 3.607534248  |
| O | 1.132377425  | 4.87912904   | 3.554647688  |
| C | -2.174727769 | -4.515203918 | 1.233271006  |
| C | -3.642126284 | -4.741939501 | -1.128288345 |
| C | -3.544422749 | -4.777512301 | 1.281511006  |
| C | -1.541727919 | -4.414369555 | -0.001986172 |
| C | -2.272671712 | -4.480930095 | -1.18486178  |
| C | -4.270596748 | -4.907687612 | 0.1019561    |
| H | -4.027603563 | -4.861252984 | 2.248598223  |
| H | -0.468149834 | -4.290992715 | -0.040569506 |
| H | -5.335297387 | -5.111027144 | 0.142138938  |
| H | -4.201811411 | -4.797912008 | -2.055296731 |
| H | -3.975697971 | -0.446621018 | -3.938515621 |

|   |              |              |              |
|---|--------------|--------------|--------------|
| C | -2.955159686 | -0.095523273 | -3.851217144 |
| H | -2.195405873 | -2.064662681 | -3.864111713 |
| C | -1.940540961 | -1.012909989 | -3.800724888 |
| C | -1.370128209 | 1.740328754  | -3.717257391 |
| C | -0.585199829 | -0.610355345 | -3.672294737 |
| C | -2.677525307 | 1.292380011  | -3.798291088 |
| C | -0.308710464 | 0.78782458   | -3.636413946 |
| C | 0.475142579  | -1.564141152 | -3.587752613 |
| H | 1.31293498   | 2.237833436  | -3.543453192 |
| C | 1.77209285   | -1.118359461 | -3.41035535  |
| C | 2.057584786  | 0.26916229   | -3.398346701 |
| H | 3.077480454  | 0.618545524  | -3.29498996  |
| C | 1.050359609  | 1.187466435  | -3.523519045 |
| C | -1.088178534 | 3.224179579  | -3.748298096 |
| H | -2.015082884 | 3.767309312  | -3.936351636 |
| H | -0.397363221 | 3.467440572  | -4.56086615  |
| C | 0.197947811  | -3.04853141  | -3.686971051 |
| N | -0.469688779 | 3.700167799  | -2.517220335 |
| H | -0.69442374  | 3.200517898  | -1.661338517 |
| N | -0.45886304  | -3.561719724 | -2.49520184  |
| H | -0.018987884 | -3.324523565 | -1.613664422 |
| C | 0.60999308   | 4.513263873  | -2.551242664 |
| C | -1.655704375 | -4.186434434 | -2.523633961 |
| O | 1.067029795  | 4.985617088  | -3.592530438 |
| O | -2.255718435 | -4.441671498 | -3.571020114 |
| C | 1.292109374  | 4.732734833  | -1.232714381 |
| C | 2.696531769  | 4.883661214  | 1.171388986  |
| C | 2.675359995  | 4.918671219  | -1.237648988 |
| C | 0.608413122  | 4.665002501  | -0.020104046 |
| C | 1.311560297  | 4.700649059  | 1.184155084  |
| C | 3.374469834  | 5.002485978  | -0.03788025  |
| H | 3.191260941  | 4.975972748  | -2.189528305 |
| H | -0.471102353 | 4.569508383  | -0.013533077 |
| H | 4.450426361  | 5.136465183  | -0.045040934 |
| H | 3.22793442   | 4.91312835   | 2.115931891  |
| H | 1.137484663  | -3.580019186 | -3.846154247 |
| H | -0.457448143 | -3.268611313 | -4.531719073 |
| O | 2.739046096  | -2.061221248 | -3.240752872 |
| C | 4.107545897  | -1.675597224 | -3.317471014 |
| H | 4.357714595  | -0.996765716 | -2.492743299 |
| O | -3.58819694  | 2.067031036  | 3.707049166  |
| O | 2.975938738  | -1.988176795 | 3.259855466  |
| C | -4.93789425  | 1.61308641   | 3.730513736  |
| H | -5.129207863 | 0.966055039  | 2.865427068  |

|   |              |              |              |
|---|--------------|--------------|--------------|
| H | -5.121157733 | 1.03081344   | 4.642105677  |
| C | 4.305136542  | -1.600767189 | 3.606810863  |
| H | 4.662498726  | -0.81126016  | 2.93566285   |
| H | 4.317010849  | -1.210954274 | 4.631844286  |
| O | -3.656077906 | 2.233579267  | -3.839718569 |
| C | -5.018644578 | 1.825750216  | -3.909539501 |
| H | -5.189063189 | 1.243779427  | -4.82386124  |
| H | -5.263437957 | 1.191751366  | -3.048259419 |
| C | -5.864508493 | 3.081243261  | -3.907988561 |
| H | -5.622268749 | 3.710155972  | -4.768288116 |
| H | -5.696816372 | 3.657039537  | -2.994408453 |
| H | -6.92263405  | 2.81349895   | -3.960699308 |
| H | 4.292443473  | -1.144199894 | -4.258929154 |
| C | 4.940463238  | -2.935893514 | -3.23342196  |
| H | 6.001792614  | -2.680023041 | -3.275757622 |
| H | 4.709374717  | -3.606946702 | -4.064151589 |
| H | 4.749915334  | -3.464474543 | -2.296223485 |
| C | 5.183414024  | -2.824694485 | 3.469296909  |
| H | 4.829037896  | -3.631880628 | 4.114892706  |
| H | 6.208736495  | -2.574618621 | 3.752500539  |
| H | 5.191261332  | -3.175152033 | 2.434222147  |
| C | -5.82517027  | 2.838977227  | 3.690182613  |
| H | -5.644991249 | 3.414683485  | 2.778931828  |
| H | -5.634688363 | 3.48085106   | 4.553911278  |
| H | -6.87483862  | 2.535696757  | 3.707793995  |
| C | 4.195333581  | -0.939421938 | 0.242582938  |
| N | 3.580588064  | 0.303489554  | 0.248426422  |
| C | 1.938753048  | -1.989179112 | -0.041540999 |
| C | 2.23388077   | 0.406798782  | 0.110936251  |
| N | 3.325217713  | -2.004142785 | 0.082595272  |
| C | 1.414150457  | -0.673509656 | -0.03778652  |
| O | 5.396312145  | -1.079101217 | 0.368466522  |
| H | 3.755667475  | -2.91940151  | 0.116301187  |
| O | 1.30857479   | -3.046620534 | -0.129518115 |
| H | 4.176734947  | 1.112536021  | 0.354533834  |
| N | 0.113961531  | -0.181922182 | -0.121289987 |
| H | -0.725337467 | -0.722993598 | -0.256340246 |
| N | 1.469047956  | 1.527127006  | 0.10830691   |
| H | 1.778638804  | 2.480122728  | 0.243196924  |
| C | 0.123645701  | 1.174216761  | -0.029951469 |
| O | -0.830560237 | 1.952610063  | -0.054538677 |

## 8. References

- [1] H. Zhang, L.-L. Wang, X.-Y. Pang, L.-P. Yang, W. Jiang, *Chem. Commun.*, 2021, **57**, 13724–13727.
- [2] a) H. Bakirci and W. M. Nau, *Adv. Funct. Mat.* 2006, **16**, 237-242. b) A. Hennig, H. Bakirci, W. M. Nau, *Nat. Methods.*, 2007, **4**, 629-632
- [3] A. Badoei-dalfard, N. Sohrabi, Z. Karami and G. Sargazi, *Biosens. Bioelectron.*, 2019, **141**, 111420.
- [4] Y. Pan, Y. Yang, Y. Pang, Y. Shi, Y. Long and H. Zheng, *Talanta*, 2018, **185**, 433-438.
- [5] H.-F. Lu, J.-Y. Li, M.-M. Zhang, D. Wu and Q.-L. Zhang, *Sens. Actuators B Chem.*, 2017, **244**, 77-83.
- [6] D. Wu, H.-F. Lu, H. Xie, J. Wu, C.-M. Wang and Q.-L. Zhang, *Sens. Actuators B Chem.*, 2015, **221**, 1433-1440.
- [7] K. Tan, G. Yang, H. Chen, P. Shen, Y. Huang and Y. Xia, *Biosens. Bioelectron.*, 2014, **59**, 227-232.
- [8] M. Amjadia, T. Hallaja and E. Nasirloo, *Microchem. J.*, 2020, **154**, 104642.
- [9] S.-M. Qu, Z. Li and Q. Jia, *ACS Appl. Mater. Interfaces.*, 2019, **11**, 34196–34202.
- [10] H.-Y. Wang, Q.-J. Lu, Y.-X. Hou, Y.-L. Liu and Y.-Y. Zhang, *Talanta*, 2016, **155**, 62-69.
- [11] Y.-Q. Wang, X. Yang, C.-Y. Gong, J.-G. Mao, Y. Wu, G.-L. Yin, T. Zhu, G.-D. Peng, Y.-J. Rao and Y. Gong, *J. Lightw. Technol.*, 2020, **38**, 1557-1563.
- [12] Y. Zhang, H. Yu, S. Chai, X. Chai, L. Wang, W.-C. Geng, J.-J. Li, Y.-X. Yue, D.-S. Guo and Y. Wang, *Adv. Sci.*, 2022, **9**, e2104463.
- [13] A. Fang, Q. Wu, Q. Lu, H. Chen, H. Li, M. Liu, Y. Zhang and S. Yao, *J. Mol. Graph. Model.*, 1996, **14**, 33–38.
- [14] N. Xiao, S.-G. Liu, S. Mo, Y.-Z. Yang, L. Han, Y.-J. Ju, N.-B. Li and H.-Q. Luo, *Sens. Actuators B Chem.*, 2018, **273**, 1735-1743.
- [15] *Gaussian 09, Revision D.01*, M. J. Frisch, G. W. Trucks, H. B. Schlegel, G. E. Scuseria, M. A. Robb, J. R. Cheeseman, G. Scalmani, V. Barone, B. Mennucci, G. A. Petersson, H. Nakatsuji, M. Caricato, X. Li, H. P. Hratchian, A. F. Izmaylov, J. Bloino, G. Zheng, J. L. Sonnenberg, M. Hada, M. Ehara, K. Toyota, R. Fukuda, J. Hasegawa, M. Ishida, T. Nakajima, Y. Honda, O. Kitao, H. Nakai, T. Vreven, J. A. 10 Montgomery, J. E. Peralta, F. Ogliaro, M. Bearpark, J. J. Heyd, E. Brothers, K. N. Kudin, V. N. Staroverov, R. Kobayashi, J. Normand, K. Raghavachari, A. Rendell, J. C. Burant, S. S. Iyengar, J. Tomasi, M. Cossi, N. Rega, J. M. Millam, M. Klene, J. E. Knox, J. B. Cross, V. Bakken, C. Adamo, J. Jaramillo, R. Gomperts, R. E. Stratmann, O. Yazyev, A. J. Austin, R. Cammi, C. Pomelli, J. W. Ochterski, R. L. Martin, K. Morokuma, V. G. Zakrzewski, G. A. Voth, P. Salvador, J. J. Dannenberg, S. Dapprich, A. D. Daniels, O. Farkas, J. B. Foresman, J. V. Ortiz, J. Cioslowski, D. J. Fox, Gaussian, Inc.: Wallingford CT, USA, 2013.
- [16] a) J.-D. Chai and M. Head-Gordon, *Phys. Chem. Chem. Phys.*, 2008, **10**, 6615–6620; b) A. V. Marenich, C. J. Cramer and D. G. Truhlar, *J. Phys. Chem. B*, 2009, **113**, 6378–6396; c) J. C. Kromann, C. Steinmann and J. H. Jensen, *J. Chem. Phys.*, 2018, **149**, 104102.

- [17] a) T. Lu and Q. Chen, *J. Comput. Chem.*, 2022, **43**, 539–555; b) T. Lu and F. Chen, *J. Comput. Chem.*, 2012, **33**, 580–592.
- [18] W. Humphrey, A. Dalke, K. Schulten, *J. Mol. Graph. Model.*, 1996, **14**, 33–38.
